# Supplementary material for: Improved cartilage regeneration by implantation of acellular biomaterials after bone marrow stimulation: a systematic review and meta-analysis of animal studies
Source: PeerJ. 2016 Sep 8;4:e2243. doi: 10.7717/peerj.2243 (PMC5018675; doi:10.7717/peerj.2243)
Supplement: Supplemental Information 3 [file peerj-04-2243-s003.xlsx]

## Sheet: Systematic Review
Supplementary Information 3. Study characteristics of included studies.
Remarks can be found below this table.
Reference		Animals						Surgery		Experimental					Meta-analysis
Author	Year of publication	Species	Strain	Number of animals	Sex (Male/Female)	Age	Weight	Location	Defect (Size / Depth)	Groups	Follow-up	Biomaterial	Biologicals	Outcome measures	Included based on full-text screening	Excluded after full-text phase	Remarks
Abarrategi1	2010	Rabbits	New Zealand White	11	-	-	3 - 3.5 kg	Medial condyle	Size: 4 mm / Depth: 5 mm	1) Chitosan 1, 2) Chitosan 2, 3) Chitosan 3, 4) Chitosan 1D, 5) Chitosan 2D, 6) Chitosan 3D, 7) Empty defect	3 months	Chitosan		Macroscopic evaluation, Semi-quantitative macroscopic evaluation, Histology, Semi-quantitative histological scoring	√
Ahn2	2009	Rabbits	New Zealand White	28	-	12 - 18 months	4.23 ± 0.33 kg	Trochlea	Size: 6 mm / Depth: 5 mm	1) Biphasic scaffold, 2) Biphasic scaffold + chondrocytes, 3) Osteochondral fragment, 4) Empty defect	3 months	β-TCP-hydroxyapatite/Hyaluronate-atelocollagen		Macroscopic evaluation, Semi-quantitative macroscopic evaluation, Histology, Immunohistochemistry, Semi-quantitative histological scoring	√
Albrecht3	1983	Rabbits	-	46	M/F	> 2 years	> 3.5 kg	Trochlea	Size: 4 mm / Depth: Osteochondral defect	1) Collagen scaffold, 2) Fibrin, 3) Fibrin-minced cartilage, 4) Collagen scaffold + fibrin, 5) Empty defect	2, 4, 6, 8, 10, 12, 18, 22, 24, 32 and 40 weeks	Fibrin, collagen scaffold		Macroscopic evaluation, Histology	X
Arakaki4	2010	Rabbits	Japanese White	20	F	Adult	3.5 ± 0.3 kg	Trochlea	Size: 4.3 mm / Depth: 9 mm	1) PAMPS-PDMAAm DN hydrogel, 2) Sham surgery (joint exposure)	4 and 12 weeks	PAMPS-PDMAAm DN hydrogel		Macroscopic evaluation, Histology, Immunohistochemistry, Semi-quantitative histological scoring, Biomechanical tests	X
Arakaki5	2011	Rabbits	-	20	F	Adult	3.5 ± 0.3 kg	Trochlea	Size: 4.3 mm / Depth: - mm (measured in histological sections)	1) PAMPS-PDMAAm DN hydrogel (mobile), 2) PAMPS-PDMAAm DN hydrogel (immobile), 3) Empty defect (mobile)	4 and 12 weeks	PAMPS-PDMAAm DN hydrogel (DN) gel		Macroscopic evaluation, Semi-quantitative macroscopic evaluation, Histology, Immunohistochemistry, Semi-quantitative histological scoring, PCR	√	X	Excluded from meta-analysis → Missing empty defect results
Arakaki6	2015	Macaques	Cynomolgus	18	-	5 - 7 years	7 - 9 kg	Trochlea	Size: 3 mm / Depth: 3 mm	1) Collagen type I hydrogel, 2) Collagen type I hydrogel + MSCs, 3) Empty defect	16 weeks	Collagen type I hydrogel		Macroscopic evaluation, Histology, Immunohistochemistry, Semi-quantitative histological scoring, Histomorphometry	√
Athanasiou7	1997	Goats	Spanish	46	F	2 - 5 years	20 - 30 kg	Medial condyle	Size: 7 mm / Depth: 7 mm	1) PLGA + PRP, 2) PLGA + PRP + 180 ng TGF-β, 3) PLGA + PRP + 1800 ng TGF-β, 4) Empty defect	12 and 24 weeks	PLGA	TGF-β1, PRP	Histology, Semi-quantitative histological scoring, Biomechanical tests	√		Assumption for meta-analysis → n = 5/group
Aulin8	2013	Rabbits	New Zealand White	20	F	6.5 - 8.3 months (avg: 7)	3.5 - 4.4 kg (avg: 3.9)	Medial and lateral condyle	Size: 4 mm / Depth: 2 mm	1) Hyaluronan hydrogel, 2) Hyaluronan hydrogel + BMP-2, 3) Empty defect + saline injected	8 and 12 weeks	Hyaluronan hydrogel	BMP-2	Macroscopic evaluation, Histology, Semi-quantitative histological scoring, Histomorphometry	√
Bai9	2008	Rabbits	New Zealand	24	M/F	Adult	2 - 3 kg	Trochlea	Size: 3 mm / Depth: 3 mm	1) Bone matrix gelatin, 2) Bone matrix gelatin + MSCs, 3) Empty defect	6 and 12 weeks	Bone matrix gelatin		Macroscopic evaluation, Histology, Immunohistochemistry, Semi-quantitative histological scoring	√		Article in Chinese, excluded for methodological quality assessment. Assumption for meta-analysis → maximum score = 14
Bal10	2010	Rabbits	New Zealand White	20	-	Adult	< 2 kg	Medial condyle and trochlea	Size: 3.2 mm / Depth: 4 mm	1) Allograft bone/PEG hydrogel, 2) Bioglass/PEG hydrogel, 3) Tantalum/PEG hydrogel, 4) Allograft bone/PEG hydrogel + MSCs, 5) Bioglass/PEG hydrogel + MSCs, 6) Tantalum/PEG hydrogel + MSCs, 7) Empty defect	day 0, 9 months	Allograft bone/PEG hydrogel, Bioglass/PEG hydrogel, Tantalum/PEG hydrogel		Macroscopic evaluation, Histology, Immunohistochemistry, Semi-quantitative histological scoring	√
Barron11	2015	Rabbits	New Zealand	9	M	Adult	> 3 kg	Medial condyle	Size: 3 mm / Depth: 2.8 mm	1) PEOT/PBT, 2) PEOT/PBT + MSCs, 3) Empty defect	1, 21 and 93 days	PEOT/PBT	Fibronectin	Histology, Immunohistochemistry, Semi-quantitative histological scoring	√
Bavaresco12	2008	Dogs	-	13	M	-	12 - 20 kg	Medial condyle	Size: 5 mm / Depth: 5 mm	1) UHMWPE/pHEMA-[MMA-co-AA], 2) β-TCP/pHEMA-[MMA-co-AA]	26 weeks	UHMWPE/pHEMA-[MMA-co-AA], β-TCP/pHEMA-[MMA-co-AA]		Macroscopic evaluation, Biomechanical tests, SEM	X
Bell13	2013	Sheeps	Arcott-cross	5	F	2 - 4 years	65 - 93 kg	Medial condyle	Size: 2 mm / Depth: 2.5 - 8.5 mm	1) Chitosan 10K-1, 2) Chitosan RITC-10K, 3) Chitosan 40K, 4) Chitosan RITC-40K, 5) Chitosan 80M4, 6) Chitosan RITC-80M3, 7) Empty defect	15 weeks	Chitosan-blood hydrogel		Macroscopic evaluation, Semi-quantitative macroscopic evaluation, Histology, Immunohistochemistry, Semi-quantitative histological scoring, µCT	X
Betsch14	2013	Minipigs	Göttingen	14	F	18 - 30 months	25 - 35 kg	Medial condyle	Size: 6 mm / Depth: 10 mm	1) TRUFIT, 2) TRUFIT + PRP, 3) TRUFIT + BMAC, 4) Trufit + PRP + BMAC	8 days and 4 months	TRUFIT BGS©(superscript) (50% PLGA, 10% PGA, 40% calcium sulphate)	PRP, BMAC	Macroscopic evaluation, Histology, Immunohistochemistry, Semi-quantitative histological scoring	X
Betsch15	2014	Minipigs	Goettinger	14	F	18 - 30 months	25 - 35 kg	Medial condyle	Size: 6 mm / Depth: 10 mm	1) TRUFIT BGS, 2) TRUFIT BGS + BMAC, 3) TRUFIT BGS + EPO, 4) TRUFIT BGS + BMAC + EPO	4 and 12 weeks	TRUFIT BGS (polylactide-co-glycolide, calcium sulfate and polyglycolide fibers)		Macroscopic evaluation, Histology, Immunohistochemistry, Semi-quantitative histological scoring, µCT	X
Bichara16	2014	Rabbits	New Zealand White	9	M	Adult	-	Medial condyle	Size: 3 mm / Depth: 6 mm	1) Polyvinyl(alcohol)-poly(acrylic acid), 2) Empty defect	8 and 12 weeks	Polyvinyl(alcohol)-poly(acrylic acid)		Macroscopic evaluation, Histology, µCT, synovial fluid analysis	X
Breinan17	2000	Dogs	Outbred hound-like	12	-	1.5 - 3 years	~ 25 kg	Trochlea	Size: 4 mm / Depth: Full-thickness cartilage + microfracture (Size: 0.8 mm / Depth: 1.5 - 2 mm, 4 penetrations/defect)	1) Type II collagen scaffold/type II collagen film, 2) No microfracture: Type II collagen scaffold +chondrocytes/type II collagen film, 3) Empty defect	6 months	Type II collagen scaffold/Type II collagen film (Chondrocell)		Macroscopic evaluation, Histology, Immunohistochemistry, Histomorphometry	X
Brittberg18	1997	Rabbits	New Zealand White	14	F	9 months	4 kg (avg)	Trochlea	Size: 9 x 4 mm2 / Depth: 2 mm	1) Fibrin glue, 2) Fibrine glue + saline injection, 3) Fibrin glue + Somatropin injection, 4) Empty defect	4 and 12 weeks	Fibrin glue (TisseelR)	Somatropin	Histology, Histomorphometry	X
Buma19	2003	Rabbits	New Zealand White	40	-	12 weeks	2.57 ± 0.23 kg	Trochlea	Size: 4 mm / Depth: 3 mm	1) Type I collagen scaffold, 2) Type I collagen scaffold + cs, 3) Type II collagen scaffold, 4) Type II collagen scaffold + cs, 5) Empty defect	4 and 12 weeks	Type I collagen scaffold ± cs, Type II collagen scaffold ± cs		Macroscopic evaluation, Histology, Semi-quantitative histological scoring, Inflammatory scoring	√
Caminal20	2015	Sheeps	Ripollesa-Lacona	8	-	3 years	-	Medial and lateral condyle	Size: 3.5 mm / Depth: 5 mm	1) PLGA, 2) PLGA + ASCs, 3) PLGA + MSCs, 4) PLGA + chondrocytes, 5) Empty defect	4 and 12 weeks	PLGA		Macroscopic evaluation, Histology, Immunohistochemistry, Semi-quantitative histological scoring, MRI	√
Cao21	2012	Rabbits	New Zealand White	18	-	-	-	Trochlea	Size: 4 mm / Depth: - mm (Full-thickness defect and implant height: 5 mm)	1) Scaffold, 2) Scaffold + ASCs, 3) Empty defect	MRI: 2, 6, 12 and 18 weeks	Collagen-modified bovine cancellous bone-collagen hydrogel-bBMPs/Collagen membrane/Collagen-chitosan-collagen hydrogel-bBMPs	Crude extracted bovine BMPs	Macroscopic evaluation, Histology, Semi-quantitative histological scoring	√
Chang22	2011	Minipigs	Lee-Sung	16	M/F	- TGF-β1: 5.8 - 6 months, + TGF-β1: 5 - 6.3 months	- TGF-β1: 20.8 - 23.5 kg (avg: 21.6), + TGF-β1: 21.9 - 28.2 kg (avg: 22.9)	Medial condyle	Size: 6.5 mm / Depth: 3 mm	1) Collagen type I hydrogel, 2) Collagen type I hydrogel + MSCs, 3) Collagen type I hydrogel + MSCs + TGF-β, 4) Empty defect	4, 8 and 12 weeks	Type I collagen hydrogel (PorcogenTM)	TGF-β1	Histology, Semi-quantitative histological scoring, Biomechanical tests	√
Chang23	2013	Rabbits	New Zealand White	22	-	4 - 5 months	2 - 3 kg	Medial condyle	Size: 3 mm / Depth: 3 mm	1) PLGA, 2) PLGA + EPCs, 3) Empty defect	8 and 24 weeks	PLGA		Macroscopic evaluation, Semi-quantitative macroscopic evaluation, Histology, Immunohistochemistry, Semi-quantitative histological scoring, uCT	√
Chang24	2013	Rabbits	New Zealand White	26	M	4 - 5 months	2 - 3 kg	Trochlea	Size: 3 mm / Depth: 3 mm	1) PLGA (IAM), 2) Empty defect (IAM), 3) PLGA (CPM), 4) Empty defect (CPM)	1, 3, 7, 14, 21, 25, 56 days	PLGA		Macroscopic evaluation, Histology, Immunohistochemistry, Semi-quantitative histological scoring, µCT	√
Chang25	2012	Rabbits	New Zealand White	38	M	4 - 5 months	2 - 3 kg	Medial condyle	Size: 3 mm / Depth: 3 mm	1) PLGA (Imm), 2) Empty defect (Imm), 3) PLGA (IAM), 4) Empty defect (IAM), 5) PLGA (CPM), 6) Empty defect (CPM), 7) Sham	Day 0 (only unoperated), 1, 3, 7, 14, 21, 35 and 56 days	PLGA		Macroscopic evaluation, Semi-quantitative macroscopic evaluation, Histology, Immunohistochemistry, Semi-quantitative histological scoring, µCT	√
Chen26	2011	Rabbits	New Zealand	32	M	Adult	3 - 3.5 kg	Femoral condyle	Size: 4.5 mm / Depth: 3 mm	1) Type II collagen scaffold, 2) Empty defect	13 weeks	Type II collagen scaffold		Histology, Immunohistochemistry, MRI, Histomorphometry	X
Chen27	2011	Rabbits	New Zealand White	36	-	4 months	-	Trochlea	Size: 4 mm / Depth: 5 mm	1) Hydroxyapatite/Chitosan-gelatin, 2) Hydroxyapatite/Chitosan-gelatin + MSCs, 3) BMP-2-activated monolayer bone graft + MSCs, 4) TGF-β1-activated monolayer cartilage graft + MSCs, 5) Empty defect	3 days and 6 weeks	Hydroxyapatite/Chitosan-gelatin	TGF-β1, BMP-2	Macroscopic evaluation, Histology, Immunohistochemistry	X
Chen28	2011	Rabbits	New Zealand White	6	-	2 months	3 kg (avg)	Trochlea	Size: 4.5 mm / Depth: 3 mm	1) Type II collagen scaffold, 2) Type II collagen scaffold + MSCs	6 and 12 weeks	Type II collagen scaffold		Macroscopic evaluation, Histology, Immunohistochemistry	X
Chen29	2015	Rabbits	New Zealand White	36	M	Adult	2.5 - 3 kg	Trochlea	Size: 3.5 / Depth: 4 mm	1) Radial type I collagen scaffold, 2) Random type I collagen scaffold, 3) Radial type I collagen scaffold + SDF-1, 4) Random type I collagen scaffold + SDF-1, 5) Sham	4, 8, 12, 24, 36 and 48 weeks	Type I collagen scaffold	SDF-1	Macroscopic evaluation, Semi-quantitative macroscopic evaluation, Histology, Immunohistochemistry, Semi-quantitative histological scoring, Histomorphometry, Biomechanical tests	X
Chen30	2014	Rabbits	New Zealand	30	M/F	Mature	2 - 2.5 kg	Medial condyle	Size: 4 mm / Depth: 3 mm	1) Ethylene glycol chitosan hydrogel, 2) Ethylene glycol chitosan hydrogel + chondrocytes, 3) Empty defect	4, 12 and 24 weeks	Ethylene glycol chitosan hydrogel		Histology	X
Cheng31	2014	Rats	RNU	20	-	-	200 - 250 gram	Trochlea	Size: 2 mm / Depth: 2 mm	1) Fibrin hydrogel, 2) Fibrin hydrogel + embryonic stem cells	4, 8, 12 and 24 weeks	Fibrin hydrogel		Macroscopic evaluation, Histology, Immunohistochemistry, Semi-quantitative histological scoring	X
Chevrier32	2007	Rabbits	New Zealand White	32	M/F	8 and 15 months	4.7 and 5 kg	Trochlea	Size: 3.5 x 4.5 mm2 / Depth: Full-thickness cartilage + microfracture (Size: 0.9 mm / Depth: 4 mm, 4 penetrations/defect)	1) Chitosan (PCCH0002)-glycerol phosphate-blood hydrogel, 2) Chitosan (PCCH00025)-glycerol phosphate-blood hydrogel, 3) Chitosan (CH10064)-glycerol phosphate-blood hydrogel, 4) Empty defect	6 and 15 weeks	Chitosan-glycerol phosphate-blood hydrogel		Histology, Immunohistochemistry, Histomorphometry, sterological measures	X
Chevrier33	2011	Rabbits	New Zealand White	35	M/F	Operated animals: 8 - 15 months, unoperated controls: 3 months	Operated animals: 4.8 kg (avg), unoperated controls: 1.9 kg	Trochlea	Size: 3.5 x 4.5 mm2 / Depth: Full-thickness cartilage + microfracture (Size: 0.9 mm / Depth: 4 mm, 4 penetrations/defect)	1) Chitosan-glycerol phosphate-blood hydrogel, 2) Empty defect	6, 12, 18 and 26 weeks	Chitosan-glycerol phosphate-blood hydrogel		Histology, Immunohistochemistry	X
Christensen34	2012	Rabbits	New Zealand White	15	M	6 months	3 kg	Trochlea	Size: 4 mm / Depth: 3 mm	1) PCL, 2) PCL + chondrocytes, 3) Type I-III collagen scaffold + chondrocytes	6, 12 and 24 weeks	PCL, Type I-III collagen scaffold (Chondro-GideR)		Macroscopic evaluation, Histology, Immunohistochemistry, Semi-quantitative histological scoring	X
Chung35	2014	Rats	Sprague-Dawley	20	M	18 weeks		Trochlea	Size: 2 mm / Depth: 3 mm	1) Hyaluronic acid hydrogel, 2) Alginate-pluronic hydrogel, 3) Hyaluronic acid-alginate-pluronic hydrogel, 4) Hyaluronic acid-alginate-pluronic-chitosan hydrogel, 5-8) + hUCB-MSCs	4 and 12 weeks	Hyaluronic acid hydrogel, Alginate-pluronic hydrogel, Hyaluronic acid-alginate-pluronic hydrogel, Hyaluronic acid-alginate-pluronic-chitosan hydrogel		Macroscopic evaluation, Semi-quantitative macroscopic evaluation, Histology, Immunohistochemistry, Semi-quantitative histological scoring	X
Coburn36	2012	Rats	Sprague-Dawley	25	M	6 weeks	-	Trochlea	Size: 1.5 mm / Depth: 1.4 - 1.5 mm	1) PVA-MA, 2) PVA-MA/cs-MA, 3) Empty defect	6, 12 and 24 weeks	PVA-MA, PVA-MA/cs-MA		Macroscopic evaluation, Histology, Histomorphometry	X
Cohen37	2003	Rabbits	New Zealand White	30	M	4 months	-	Trochlea	Size: 4 x 4 mm2 / Depth: 3 mm	1) Alginate hydrogel, 2) PGA-PLA (90%-10%)/Alginate hydrogel + chondrocytes, 3) PGA-PLA (50%-50%)/Alginate hydrogel + chondrocytes, 4) Empty defect	8 and 12 weeks	Alginate hydrogel, PGA-PLA (90%-10%)/Alginate hydrogel, PGA-PLA (50%-50%)/Alginate hydrogel		Macroscopic evaluation, Histology, Semi-quantitative histological scoring	√
Cui38	2007	Rabbits	New Zealand White	72	-	2 months	1.8 - 2.3 kg	Femoral condyle	Size: 4 mm / Depth: Osteochondral defect	1) PLGA, 2) PLGA + BMP-2, 3) PLGA + MSCs, 4) Empty defect	2, 3, 4 and 8 weeks	PLGA	rhBMP-2	Macroscopic evaluation, Histology, Semi-quantitative histological scoring	√	X	Excluded from meta-analysis → No standard deviations available
Cui39	2008	Rabbits	New Zealand White	24	M/F	24 months	1.8 - 2.3 kg (avg: 2)	Medial and lateral condyle	Size: 4 mm / Depth: 3 mm	1) PLGA + BMP-2, 2) Collagen scaffold + BMP-2, 3) Empty defect	4, 8 and 12 weeks	PLGA, Type ? collagen scaffold	rhBMP-2	Macroscopic evaluation, Histology, Semi-quantitative histological scoring	√		Article in Chinese, excluded for methodological quality assessment
Cui40	2009	Rabbits	New Zealand White	36	-	2 months	1.8 - 2.3 kg (avg: 2 kg)	Femoral condyle	Size: 4 mm / Depth: Osteochondral defect	1) PLGA, 2) PLGA + MSCs, 3) Empty defect	4 and 12 months	PLGA		Macroscopic evaluation, Histology, Semi-quantitative histological scoring	√	X	Excluded from meta-analysis → No standard deviations available
Cui41	2013	Rats	Sprague-Dawley	-	M	-	-	Trochlea	Size: 1.5 mm / Depth: 2 - 3 mm	1) PDLA/PCL, 2) PDLA/PCL + chitosan hydrogel, 3) Empty defect	12 weeks	PDLA/PCL ± chitosan hydrogel		Histology	X
Dahlberg42	1991	Rabbits	White	42	-	Adult	3.1 - 4.3 kg	Trochlea	Size: 5 or 15 mm2 / Depth: 4 mm	1) DABM (lyophilized), 2) DABM (hydrated), 3) Empty defect	6 and 12 weeks	Demineralized allegenic bone matrix		Macroscopic evaluation, Histology	X
Dahlin43	2014	Rats	Lewis	40	M	12 weeks	300 - 250 gram	Trochlea	Size: 1.5 mm / Depth: 1.5 mm	1) PCL, 2) PCL + MSCs, 3) PCL + condrocytes, 4) PCL + MSCs + chondrocytes, 5) Empty defect	3 months	PCL		Histology, Semi-quantitative histological scoring, µCT	√	X	Excluded from meta-analysis → Incorrect data
Dai44	2014	Rabbits	New Zealand White	45	-	4 - 6 months	2.5 - 3 kg	Trochlea	Size: 4 mm / Depth: Full-thickness cartilage defect + microfracture (Size: - mm / Depth: - mm, - penetrations/defect)	1) DCCBM (no microfracture), 2) DCCBM, 3) Empty defect	2, 90, 180 and 270 days	Decalcified cortical-cancellous bone matrix		Macroscopic evaluation, Histology, Immunohistochemistry, Semi-quantitative histological scoring, Biomechanical tests	√
de Mulder45	2014	Rabbits	New Zealand White	26	F	Adult	4.1 ± 0.12 kg	Trochlea	Size: 4 mm / Depth: 3 mm	1) Isotropic scaffold, 2) Perpendicular anisotropic scaffold, 3) Parallel anisotropic scaffold, 4) Empty defect	6 months	Type I collagen scaffold		Macroscopic evaluation, Histology, Semi-quantitative histological scoring	√
Deng46	2014	Rabbits	New Zealand White	36	-	12 weeks	2.5 - 3 kg	Trochlea	Size: 15 x 10 mm / Depth: 5 mm	1) Gelatin-ceramic bovine bone/gelatin-chondroitin sulphate-sodium hyaluronate, 2) Gelatin-ceramic bovine bone/gelatin-chondroitin sulphate-sodium hyaluronate + chondrocyte + MSCs, 3) Empty defect	14 days and 3 months	Gelatin-ceramic bovine bone/gelatin-chondroitin sulphate-sodium hyaluronate		Macroscopic evaluation, Histology, Immunohistochemistry, Semi-quantitative histological scoring, PCR	√
Di47	2010	Rabbits	New Zealand White	30	M	34 - 37 weeks	3 - 4 kg	Trochlea	Size: 3 mm / Depth: Osteochondral defect	1) Alginate hydrogel, 2) Alginate hydrogel + chondrocytes, 3) Empty defect	6, 8, 10, 12, 16, 20, 26 and 30 weeks	Alginate hydrogel		Histology, Immunohistochemistry, Semi-quantitative histological scoring	√		Article in Chinese, excluded for methodological quality assessment. Assumption for meta-analysis → maximum score = 14
Diduch48	2000	Rabbits	New Zealand White	12	-	4 months	8 - 10 lb	Medial condyle	Size: 6 x 3 mm2 / Depth: 3 mm	1) Alginate hydrogel, 2) Alginate hydrogel + marrow stromal cells, 3) Empty defect	4 weeks	Alginate hydrogel		Macroscopic evaluation, Histology	X
Ding49	2008	Rabbits	New Zealand White	18	M/F	3 months	3 ± 0.2 kg	Condyle	Size: 3 mm / Depth: 3 mm	1) PLGA, 2) PLGA + MSCs, 3) PLGA + MSCs (modified hIGF-1 gene), 4) Empty defect	5 weeks	PLGA		Macroscopic evaluation, Histology, Immunohistochemistry, Semi-quantitative histological scoring	√		Article in Chinese, excluded for methodological quality assessment
Dorotka*50	2005	Sheeps	Austrian	27	-	3 - 5 years	78 kg (avg)	Medial condyle	Size: 4.5 mm / Depth: Full-thickness cartilage defect + microfracture (Size: - mm / Depth: 2 mm, 4 penetrations/defect)	1) Collagen scaffold, 2) Collagen scaffold + chondrocytes, 3) Empty defect, 4) Empty chondral defect and microfracture	6 weeks	Type type I-III collagen scaffold/Type II collagen scaffold		Macroscopic evaluation, Histology, Immunohistochemistry, Semi-quantitative histological scoring	√
Dresing51	2014	Rabbits	New Zealand White	18	F	32 ± 4 weeks	4 ± 0.4 kg	Trochlea	Size: 2.7 mm / Depth: 4 mm	1) Biphasic scaffold, 2) Biphasic scaffold + separating membrane, 3) Empty defect	12 weeks and 6 months	Poly(ester-urethane)-hydroxyapatite particles/Poly(ester-urethane)		Macroscopic evaluation, Semi-quantitative macroscopic evaluation, Histology, Immunohistochemistry, Semi-quantitative histological scoring, µCT	√
Duan52	2013	Rabbits	New Zealand White	36	-	5 - 6 months	3 - 3.3 kg	Femoral condyle	Size: 4 mm / Depth: 5 mm	Chondral/Osseous: 1) 50-100 µm/300-450 µm), 2) 100-200 µm/300-450 µm), 3) 200-300 µm/200-300 µm), 4) 300-450 µm/100-200 µm, 5) 300-450 µm/50-100 µm, 6-10: condition 1-5 + MSCs, 11) Autologous osteochondral plug, 12) Empty defect	12 weeks	PLGA/PLGA		Macroscopic evaluation, Histology, Immunohistochemistry, Semi-quantitative histological scoring	√
Duan53	2013	Dogs	Beagle	12	-	1 year	13 - 16 kg	Trochlea	Size: 6 mm / Depth: 5 mm	1) Biphasic scaffold, 2) Biphasic scaffold + MSCs, 3) Empty defect	12 and 20 weeks	Titanium/Type I collagen-glycosaminoglycans titanium biphasic scaffold (CGT)		Macroscopic evaluation, Histology, Immunohistochemistry, Semi-quantitative histological scoring, µCT	√
Endo54	2015	Rabbits	New Zealand White	15	M	12 weeks	2 kg (avg)	Trochlea	Size: 4 mm / Depth: 1 mm	1) Atellocollagen scaffold, 2) Atellocollagen scaffold + chondrocytes	1, 2, 4 and 6 months	Atellocollagen scaffold		Macroscopic evaluation, Histology, Semi-quantitative histological scoring, Biochemical assay, MRI	X
Enea55	2013	Rabbits	New Zealand White	8	-	180 days	4 kg	Medial condyle	Size: 4 mm / Depth: Full-thickness cartilage defect + microfracture (Size: 21G needle / Depth: - mm, - penetrations/defect)	1) Type I-II collagen scaffold, 2) Empty defect	24 weeks	Type I-II collagen scaffold		Macroscopic evaluation, Semi-quantitative macroscopic evaluation, Histology, Semi-quantitative histological scoring, SEM	√
Erggelet56	2009	Sheeps	Merino	8	F	3 years	-	Medial condyle	Size: 11 x 8 mm2 / Depth: Full-thickness cartilage defect + microfracture (Size: - / Depth: 2 mm, 9 penetrations/defect)	1) PGA-hyaluronic acid, 2) Empty defect	6, 12 and 24 weeks	PGA-hyaluronic acid	Autologous sheep serum	Histology, Immunohistochemistry, Semi-quantitative histological scoring	√
Erggelet57	2007	Sheeps	Merino	8	F	3 years	-	Medial condyle	Size: 11 x 8 mm2 / Depth: Full-thickness cartilage defect + microfracture (Size: - / Depth: 2 mm, 9 penetrations/defect)	1) PGA-hyaluronic acid, 2) Empty defect	1, 2, 3, 6 and 12 weeks	PGA-hyaluronic acid	Autologous sheep serum	Macroscopic evaluation, Histology	X
Feczko58	2003	Dogs	German Shepherd	50	M/F	4 - 7 years (avg: 5.2)	-	Trochlea	Size: 2.7 mm, 3.5 mm, 4.5 mm, 6.5 mm (depending on size implant) / Depth: - mm	1) Hydroxylapatite rods, 2) Polyglyconate-B rods, 3) Carbon rods, 4) PS0430/001, 5) PS0430/002, 6) Collagen sponge, 7) Empty defect	4, 8, 12, 24 and 48 weeks	Hydroxylapatite rods, Polyglyconate-B rods, Carbon rods, EZ-set materials containing PCL and fluid PCL (PS0430/001 and PS0430/002), P1076 collagen scaffold		Macroscopic evaluation, Histology, Arthroscopy	X
Fernandez59	2012	Rabbits	New Zealand White	-	-	6 months	-	Medial condyle	Size: 3.5 mm / Depth: 4 mm	1) HASi, 2) BCP, 3) Non-operated control	2, 4 and 12 weeks	Triphasic ceramic coated hydroxyapatite (HASi), BCP		Histology, Back scatter electron imaging	X
Ferretti60	2006	Rats	Sprague-Dawley	24	M	12 weeks	-	Trochlea	Size: 1.5 mm / Depth: 1.5 mm	1) PEG-genipin (8 mM), 2) PEG-genipin (17.6 mM) 3) PEG-genipin (35.2 mM)	4, 8 and 12 weeks	PEG-genipin hydrogel		Macroscopic evaluation, Histology, Semi-quantitative histological scoring	X
Filova61	2008	Rabbits	New Zealand White	19	M	2 months	2.8 kg	Trochlea	Size: 3 mm / Depth: 2 mm	1) Hydrogel, 2) Hydrogel + chondrocytes, 3) Empty defect	4 and 12 weeks	Type I collagen-hyaluronan-Tissucol-thrombin hydrogel		Macroscopic evaluation, Histology, Immunohistochemistry, Biomechanical tests	X
Filova62	2007	Minipigs	-	9	-	-	-	Medial condyle	Size: 6 mm / Depth: 2 mm	1) Hydrogel, 2) Hydrogel + chondrocytes, 3) Empty defect	6 and 12 weeks	Type I collagen-hyaluronate-fibrin hydrogel		Macroscopic evaluation, Histology, Immunohistochemistry, Semi-quantitative histological scoring, Histomorphometry, MRI	√
Filova63	2013	Minipigs	-	8	M	7 months	29 ± 10.5 kg	Femoral condyle	Size: 8 mm / Depth: 2.7 mm	1) Hydrogel, 2) Empty defect	8 and 12 weeks	Hyaluronate-type I collagen-fibrin hydrogel-PVA nanofibers-liposomes	bFGF, insulin	Histology, Immunohistochemistry, Semi-quantitative histological scoring	√
Fonseca64	2014	Sheeps	Ripollesa-Lacona	6	-	2 years	-	Medial condyle	Size: 3.5 mm / Depth: 5 mm	1) PLGA, 2) PLGA + chondrocytes, 3) Empty defect	26 weeks	PLGA		Macroscopic evaluation, Semi-quantitative macroscopic evaluation, Histology, Immunohistochemistry, Semi-quantitative histological scoring, MRI	√
Fragonas65	2000	Rabbits	New Zealand White	32	-	4 - 5 months	1.5 - 2 kg	Medial condyle	Size: 3 mm / Depth: - (Chondral defect + subchondral bone plate)	1) Alginate hydrogel, 2) Alginate hydrogel + chondrocytes	12 and 26 weeks	Alginate hydrogel		Macroscopic evaluation, Histology, MRI, SRIXE	X
Frenkel66	2005	Rabbits	New Zealand White	18	F	9 months	-	Medial condyle	Size: 3 mm / Depth: 2.8 mm	1) PLA-hyaluronan/hyaluronan-chitosan scaffold, 2) PLA-hyaluronan/Type I collagen scaffold, 3) Empty defect	12 months	PLA-hyaluronan/hyaluronan-chitosan scaffold and PLA-hyaluronan/Type I collagen scaffold		Macroscopic evaluation, Histology, Immunohistochemistry, Semi-quantitative histological scoring	√
Frenkel67	1997	Rabbits	New Zealand White	51	M	Adult	-	Trochlea	Size: 3 mm / Depth: - (Osteochondral defect)	1) Collagen scaffold, 2) Collagen scaffold + chondrocytes, 3) Empty defect	6, 12 and 52 weeks	Type I collagen (dense)/Type I collagen (porous)		Histology, Semi-quantitative histological scoring, Biochemical assays, Biomechanical tests, SDS-PAGE	√
Fujimoto68	1999	Rabbits	Japanese White	84	-	-	2.3 kg	Trochlea	Size: 4 mm / Depth: 2 mm	1) bFGF, 2) Type I collagen scaffold, 3) Type I collagen scaffold + bFGF, 4) Empty defect	12 weeks	Type I collagen scaffold	bFGF	Macroscopic evaluation, Histology, Immunohistochemistry, Semi-quantitative histological scoring	√
Fukuda69	2005	Rabbits	Japanese white	72	F	Adult	4 kg	Trochlea	Size: 6 x 6 mm2 / Depth: 3 mm	1) LLDPE-coated UHMWPE-type I collagen hydrogel, 2) LLDPE-coated UHMWPE-type I collagen hydrogel + bFGF, 3) Empty defect	12 and 24 weeks	LLDPE-coated UHMWPE-type I collagen hydrogel	bFGF	Macroscopic evaluation, Immunohistochemistry, Semi-quantitative histological scoring, µCT, Biomechanical tests	X
Fukui70	2014	Rabbits	Japanese White	48	F	6 months	3.6 ± 0.6 kg	Trochlea	Size: 4.3 mm / Depth: 2 mm	Exp 1: 1) Hydrogel, 2) Hydrogel + hyaluronic acid injection, 3) Empty defect, 4) Empty defect + hyaluronic acid injection. Exp 2: 1) Hydrogel, 2) Hydrogel + hyaluronic acid injection	4, 8, 12 and 24 weeks	PAMPS-PDMAAm DN hydrogel		Macroscopic evaluation, Histology, Immunohistochemistry, Semi-quantitative histological scoring, PCR	√
Gang71	2011	Rabbits	New Zealand	56	M/F	8 - 12 months?	1.8 - 2 kg	Trochlea	Size: 3 mm / Depth: 3 mm	1) Hydroxyapatite/Silk fibroin + TGF-β1 + IGF-1, 2) Hydroxyapatite/Silk fibroin + TGF-β1 + IGF-1 + ASCs, 3) Empty defect	12 weeks	Hydroxyapatite/Silk fibroin	TGF-β1, IGF-1	Macroscopic evaluation, Histology, CT, MRI	X
Gao72	2002	Rabbits	New Zealand White	9	-	4 months	-	Medial condyle	Size: 3 mm / Depth: 3 mm	1) ICP/HYAFF, 2) ICP/HYAFF + autologous MPCs, 3) ICP/ACP, 4) ICP/ACP + autologous MPCs	0 and 70 days	Injectable calcium phosphate/Hyaluronic acid sponge (HYAFF 11 or ACP)		Macroscopic evaluation, Histology	X
Gao73	2004	Rabbits	New Zealand White	10	-	4 months	-	Medial condyle	Size: 3 mm / Depth: 3 mm	1) DTBM, 2) DCBM	4 weeks	DTBM, DCBM		Macroscopic evaluation, Histology	X
Gao74	2012	Rabbits	New Zealand	40	F	6 - 8 months	2 - 3 kg	Intercondylar fossa	Size: ? / Depth: Full-thickness cartilage defect + microfracture (?)	1) Fibrin hydrogel (chondral defect), 2) Fibrin hydrogel + BM-MNCs (chondral defect), 3) Microfracture + fibrin hydrogel, 4) Microfracture + fibrin hydrogel + BM-MNCs	12 weeks	Fibrin hydrogel		Macroscopic evaluation, Histology, Immunohistochemistry, Semi-quantitative histological scoring	X
Getgood75	2012	Sheeps	Welsh Mountain	24	-	4.3 years	-	Proximal lateral trochlea sulcus and medial condyle	Size: 5.8 mm / Depth: 6 mm	1) Scaffold, 2) Scaffold + BMAC, 3) Scaffold + PRP, 4) Empty defect	8 and 14 weeks	Type I collagen-chondroitin-6-sulphate-brushite/Type I collagen-chondroitin-6-sulphate (ChondroMimetic)	Concentrated bone marrow aspirate, PRP	Macroscopic evaluation, Semi-quantitative macroscopic evaluation, Histology, Immunohistochemistry, Semi-quantitative histological scoring, Biomechanical tests	√
Getgood76	2012	Goats	Boer-cross	21	M	Adult	50 - 79 kg	Medial condyle and trochlea	Size: 5.8 mm / Depth: 6 mm	1) ChondroMimetic scaffold, 2) TRUFIT scaffold, 3) Empty defect	4, 8 and 12 weeks	Type I collagen-chondroitin-6-sulphate-brushite/Type I collagen-chondroitin-6-sulphate (ChondroMimetic), TRUFIT (50% PLGA, 10% PGA, 40% calcium sulfate)		Macroscopic evaluation, Semi-quantitative macroscopic evaluation, Histology, Semi-quantitative histological scoring, Biomechanical tests	√
Ghosh77	2014	Rabbits	New Zealand White	8	M	-	2 kg	Femoral condyle	Size: 4 mm / Depth: 5 mm	1) Chitosan hydrogel, 2) Empty defect	2, 4, 8, 12 and 24 weeks	Chitosan hydrogel		Macroscopic evaluation, Histology, Semi-quantitative histological scoring	√
Giordano78	2011	Sheeps	-	12	-	9 - 13 months (avg: 11)	52 kg (avg)	Trochlea and condyle	Size: 6 mm / Depth: Full-thickness cartilage defect + microfracture (Size: 1.5 mm / Depth: 20 mm, 3 penetrations/defect)	1) Empty defect (chondral), 2) Microfracture + type I collagen film, 3) Microfracture	8 and 12 weeks	Type I collagen scaffold		Macroscopic evaluation, Semi-quantitative macroscopic evaluation, Histology, Immunohistochemistry, Semi-quantitative histological scoring	√
Gong79	2014	Pigs	Chang Feng hybrid	16	M/F	1 year	-	Trochlea	Size: 8 mm / Depth: 6 mm	1) PGA-PLA, 2) PGA-PLA + ASCs	3, 6 and 12 weeks	PGA-PLA		Macroscopic evaluation, Semi-quantitative macroscopic evaluation, Histology, Immunohistochemistry, Semi-quantitative histological scoring, Biochemical assays, Biomechanical tests, Proteome analysis	X
Gotterbarm80	2006	Minipigs	Göttingen	27	M/F	26 months (avg)	37 kg (avg)	Trochlea	Size: 5.4 mm / Depth: 8 mm	1) β-TCP/Type I-III collagen, 2) β-TCP/Type I-III collagen + growth factor mixture, 3) Empty defect	6 months	β-TCP/Type I-III collagen		Macroscopic evaluation, Histology, Semi-quantitative histological scoring, Biomechanical tests	√
Guenther81	2014	Minipigs	-	10	-	-	-	Femoral condyle	Size: 7 mm / depth: 10	1) Spongy bone cylinder (Tutobone®)/Collagen membrane, 2) Spongy bone cylinder (Tutobone®)/Collagen membrane (Chondrogide®) + BMAC, 3) Spongy bone cylinder (Tutobone®), 4) Empty defect	1, 2 and 8 weeks	Spongy bone cylinder (Tutobone®)/Collagen membrane (Chondrogide®), Spongy bone cylinder (Tutobone®)		Macroscopic evaluation, Histology, Semi-quantitative histological scoring, Spectrometric analysis	√
Guo82	2007	Rabbits	New Zealand White	15	M/F	4 - 5 months	-	Trochlea	Size: 5 mm/ Depth: 5 mm	1) Chitosan, 2) Chitosan + MSCs, 3) Chitoson + TGF-β1-transfected MSCs	6 months	Chitosan scaffold		Macroscopic evaluation, Histology, Immunohistochemistry, Semi-quantitative histological scoring	X
Guo83	2008	Rabbits	New Zealand White	36	M/F	5 - 8 months	160 - 240 gram (avg: 182)	Trochlea	Size: 5 mm / Depth: 5 mm	1) Hydroxyapatite-polyamide 66/PVA hydrogel, 2) PVA hydrogel, 3) Empty defect	1 day and 8 weeks	PVA hydrogel, Hydroxyapatite-polyamide 66/PVA hydrogel		Macroscopic evaluation?, Histology, Biomechanical tests, SEM	X
Guo84	2008	Rabbits	New Zealand	72	M/F	5 - 8 months	160 - 240 gram (avg: 182 gram)	Trochlea	Size: 5 mm / Depth: 5 mm	1) PVA hydrogel, 2) Hydroxyapatite-polyamide 66/PVA hydrogel, 3) Empty defect	6 and 12 weeks	PVA hydrogel, Hydroxyapatite-polyamide 66/PVA hydrogel		Macroscopic evaluation, Histology, Immunohistochemistry, SEM	X
Guo85	2010	Rabbits	New Zealand White	18	-	6 months	-	Medial condyle	Size: 3 mm / Depth: 3 mm	1) OPF hydrogel + GMP, 2) OPF hydrogel + GMP + MSCs, 3) OPF hydrogel + GMP + MSCs + TGF-β1	4 and 17 weeks	OPF hydrogel + GMP	TGF-β1	Macroscopic evaluation, Histology, Semi-quantitative histological scoring	X
Gupta86	2014	Rabbits	New Zealand White	36	F	-	2 - 3 kg	Medial condyle	Size: 4 mm / Depth: 4 mm	1) Chitosan-agarose-gelatin hydrogel, 2) Empty defect	12 weeks	Chitosan-agarose-gelatin hydrogel		Macroscopic evaluation, Histology, Immunohistochemistry, Semi-quantitative histological scoring, Hematological and cytokine analysis	√
Guzman-Morales87	2014	Rabbits	New Zealand White	7	M/F	13 months (n = 3), 32 months (n = 4)	4.53 - 0.67 kg	Trochlea	Size: 1.5 mm / Depth: 2 mm	1) 10 kDa chitosan-blood (distal), 2) 40 kDa chitosan-blood (proximal), 3) Empty defect (distal), 4) Empty defect (proximal)	3, 6, 12 and 18 weeks	Chitosan-blood hydrogel		Macroscopic evaluation, Semi-quantitative macroscopic evaluation, Histology, Immunohistochemistry, Semi-quantitative histological scoring, Knee effusion score, µCT	√
Hamanishi88	2013	Rats	Sprague-Dawley	26	M	12 weeks	-	Trochlea	Size: 2 mm / Depth: Full-thickness cartilage defect + microfracture (Size: 0.2 mm / Depth: - mm, 5 penetrations/defect)	1) Chondral defect only, 2) Chondral defect + microfracture + glue/membrane, 3) Chondral defect + microfracture	4 and 12 weeks	Aron Alpha A Sankyo glue (containing acyanoacrylate monomer)/Recombinant peptide membrane		Macroscopic evaluation, Histology, Immunohistochemistry, Semi-quantitative histological scoring, PCR	√
Han89	2009	Rabbits	New Zealand White	30	M/F	Adult	2 ± 0.5 kg	Condyle	Size: 4 mm / Depth: 2 mm	1) Collagen-chitosan-heparin-TGF-β1, 2) Collagen-chitosan-heparin-TGF-β1 + ADSc, 3) Empty defect	2 and 4 months	Collagen-chitosan-heparin scaffold	TGF-β1	Macroscopic evaluation, Histology, Immunohistochemistry	√		Article in Chinese, excluded for methodological quality assessment
Han90	2015	Rabbits	New Zealand White	4	-	-	2 - 2.5 kg	Trochlea	Size: 5 mm / Depth: 6 mm	1) Gelatin-carboxymethyl chitosan hydrogel, 2) Gelatin-carboxymethyl chitosan hydrogel + TGF-β1	2, 4 and 12 weeks	Gelatin-carboxymethyl chitosan hydrogel	TGF-β1	Macroscopic evaluation, Histology	X
Hannink91	2012	Rabbits	New Zealand White	16	F	Adult	3.2 - 4.9 kg (avg: 3770 ± 403)	Trochlea	Size: 4 mm / Depth: 3 mm	1) PCL-polyurethane (3 mm heigh), 2) PCL-polyurethane (4 mm heigh)	16 weeks	PCL-polyurethane		Macroscopic evaluation, Histology, Immunohistochemistry, Semi-quantitative histological scoring	X
Hao92	2006	Rabbits	Qingzilan	36	M/F	4 - 6 months	2.5 - 3.5 kg		Size: 5 mm / Depth: 3 mm	1) Hydroxyapatite-calcium phosphate/PLA, 2) Hydroxyapatite-calcium phosphate/PLA + MSCs, 3) Empty defect	5 months	Hydroxyapatite-calcium phosphate/PLA		Macroscopic evaluation, Histology, Immunohistochemistry, Semi-quantitative histological scoring	√	X	Excluded from meta-analysis → Maximum score scoring system unknown. The paper describes the use of the scoring system described in reference 3, however, this reference does not contain histological scoring
Hasegawa93	1999	Rabbits	Japanese White	36	F	Adult	3.2 - 4 kg	Trochlea	Size: 10 x 5 mm / Depth: 5 mm	1) LLDPE, 2) Empty defect	9 weeks	LLDPE (FABRICUBETM)		Macroscopic evaluation, Histology, Immunohistochemistry, Histomorphometry	X
He94	2012	Rabbits	New Zealand White	24	M/F	4 months	1.4 - 1.7 kg	Trochlea	Size: 3.8 mm / Depth: 2 mm	1) Type I-III collagen membrane, 2) Type I-III collagen membrane + MSCs	8 weeks	Type I-III collagen membrane		Macroscopic evaluation, Histology, Immunohistochemistry, Semi-quantitative histological scoring	X
Heikkila95	1993	Rabbits	New Zealand White Star	23	M/F	6 - 12 months	2.9 - 4.2 kg	Trochlea and medial and lateral condyle	Size: - mm / Depth: - mm (Implant length: 9 mm, diameter: 2.5 or 4 mm)	1) Bioglass, 2) Hydroxyapatite, 3) Empty defect	4 and 12 weeks	Bioglass, Hydroxyapatite		Macroscopic evaluation, Histology, X-ray, SEM, EDXA	X
Ho96	2010	Pigs	Yorkshire Duroc	-	-	6 months	-	Medial condyle and trochlea	Size: 8 mm / Depth: 8 mm	1) PCL-TCP/PCL + mesh, 2) PCL-TCP/PCL + MSCs + mesh, 3) PCL-TCP/PCL + MSCs	4 and 12 weeks	PCL-TCP/PCL/PCL-collagen mesh		Macroscopic evaluation, Histology, Immunohistochemistry, Semi-quantitative histological scoring, Biomechanical tests, µCT	X
Hoemann97	2010	Rabbits	New Zealand White	16	M/F	10, 12, and 24 months	-	Trochlea	Size: 3.5 x 4.5 mm / Depth: Full-thickness cartilage defect + microfracture (Size: 0.9 mm / Depth: 3.5 mm, 4 penetrations/defect)	1) Chitosan-glycerol phosphate-blood hydrogel, 2) Trombin	3 months	Chitosan-glycerol phosphate-blood hydrogel		Histology, Immunohistochemistry, Histomorphometry	X
Hoemann98	2005	Sheeps	Suffolk-Dorset	18	F	3 - 6 years	70 - 90 kg	Distal femur, medial condyle and trochlea	Size: 9 x 10.5 mm or 7.6 x 12 mm / Depth: Full-thickness cartilage defect + microfracture (Size: 1.5 mm / Depth: 3 mm, 14 - 20 penetrations/defect)	1) Chitosan-glycerol phosphate-blood hydrogel, 2) Impact + Chitosan-glycerol phosphate-blood hydrogel, 3) Microfracture, 4) Impact + microfracture	3 months	Chitosan-glycerol phosphate-blood hydrogel		Macroscopic evaluation, Histology, Immunohistochemistry, Semi-quantitative histological scoring, Biochemical assays, Histomorphometry	√	X	Excluded from meta-analysis → No means and standard deviations available
Hoemann99	2007	Rabbits	New Zealand White	19	F	9 - 15 months	4.6 ± 0.8 kg	Trochlea	Size: 3.5 x 4 mm / Depth: 200 μm + microfracture (Size: 0.9 mm / Depth: 3 - 4 mm, 4 penetrations/defect)	1)Chitosan-glycerol phosphate-blood hydrogel, 2) Empty defect	8 and 12 weeks	Chitosan-glycerol phosphate-blood hydrogel		Macroscopic evaluation, Histology, Immunohistochemistry, Semi-quantitative histological scoring, Histomorphometry	√
Hogervorst100	1992	Rabbits	New Zealand White	32	-	-	-	Lateral condyle and lateral tibial plateau	Size: 3 mm / Depth: 5 mm (femoral condyle) or 10 mm (tibial defect)	1) TCP/Type I-II collagen scaffold (femoral condyle), 2) TCP/Type I-II collagen scaffold + penetration epiphysis (tibial plateau), 3) Empty defect (femoral condyle)	6 months	TCP/Type I-II collagen scaffold		Macroscopic evaluation, Histology, Microangiography, x-ray, Function score	X
Holland101	2005	Rabbits	New Zealand White	17	-	4 months	-	Medial condyle	Size: 3 mm / Depth: 3 mm	1) OPF hydrogel-GMP/OPF hydrogel-GMP+TGF-β1, 2) OPF hydrogel/OPF hydrogel-GMP+TGF-β1, 3) OPF hydrogel/OPF hydrogel-GMP	4, 12 and 24 weeks	OPF hydrogel-GMP	TGF-β1	Macroscopic evaluation, Histology, Semi-quantitative histological scoring	X
Holland102	2007	Rabbits	New Zealand White	24	-	6 months	-	Medial condyle	Size: 3 mm / Depth: 3 mm	1) OPF hydrogel + TGF-β1, 2) OPF hydrogel + IGF-1, 3) OPF hydrogel + TGF-β1 + IGF-1, 4) Empty defect	6 and 12 weeks	OPF hydrogel	TGF-β1, IGF-1	Macroscopic evaluation, Histology, Semi-quantitative histological scoring	√		Assumption for meta-analysis → n = 10/group
Holmes103	1975	Rabbits	California White	70	-	12 weeks (# 36) and 8 months (# 34)	-	Trochlea	Size: 5 mm / Depth: 5 mm	1) Collagen scaffold, 2) PVA scaffold, 3) Empty defect	4, 8 en 16 weeks	Type ? Collagen scaffold, PVA scaffold		Macroscopic evaluation, Histology, X-ray, SEM	X
Howard104	2015	Sheeps	Welsh Mountain	40	F	3.9 years (avg)	40 - 42 kg	Medial condyle	Size: 8 mm / Depth: Full-thickness + microfracture (Size: 1.5 mm / Depth: 3 mm, 7 penetrations/defect)	1) Collagen membrane (CM), 2) CM + 0.064 ug rhFGF-18, 3) CM + 0.64 ug rhFGF-18, 4) CM + 6.4 ug rhFGF-18, 5) CM + 32 ug rhFGF-18, 6) CM + 32 ug rhFGF-18, 7) Empty defect + carrier vehicle, 8) Empty defect + rhFGF-18	3 and 12 months	Collagen membrane (Chondrogide)		Macroscopic evaluation, Semi-quantitative macroscopic evaluation, Histology, Immunohistochemistry, Semi-quantitative histological scoring, Biomechanical tests, Serum and synovial fluid analysis	√
Huang105	2007	Rabbits	Japanese White	21	F	Adult	3 kg	Medial condyle	Size: 4 mm / Depth: 5 mm	1) PLA + bFGF, 2) Amorphous calcium phosphate particles-PLA + bFGF, 3) Empty defect	4 and 12 weeks	Amorphous calcium phosphate particles-PLA	bFGF	Macroscopic evaluation, Histology, Immunohistochemistry, Semi-quantitative histological scoring, PCR	√
Huang106	2014	Rabbits	New Zealand White	46	-	5 - 6 months	2.7 - 3 kg	Trochlea	Size: 4 mm / Depth: 2.5 mm + microfracture	1) Demineralized bone matrix-chitosan hydrogel, 2) Demineralized bone matrix-chitosan hydrogel + E7 peptide, 3)Empty defect	1 and 4 months	Demineralized bone matrix-chitosan hydrogel		Macroscopic evaluation, Histology, Immunohistochemistry, Semi-quantitative histological scoring, Biomechanical tests, MRI, SEM, synovial fluid analysis	√
Huh107	2014	Rabbits	New Zealand White	10	-	-	4 kg	Trochlea	Size: 4 mm / Depth: Full-thickness cartilage defect + 3 holes in subchondral bone	1) PRP, 2) Empty defect	3-4 and 9 months	PRP		Macroscopic evaluation, Histology, Immunohistochemistry, Semi-quantitative histological scoring	√
Hui108	2013	Minipigs	Prestige World Genetics micropigs	12	F	8 months	12 kg	Medial and lateral condyle	Size: 6 mm / Depth: 1 mm	1) OPF hydrogel, 2) Empty defect	1.5, 4 and 18 months	OPF hydrogel	bFGF	Macroscopic evaluation, Histology, Immunohistochemistry, Semi-quantitative histological scoring, Histomorphometry	√
Igarashi109	2010	Rabbits	Japanese White	73	F	-	2.6 - 2.9 kg	Trochlea	Size: 5 mm / Depth: 3 mm	1) Commercial grade alginate, 2) Commercial grade alginate + MSCs, 3) Purified alginate, 4) Purified alginate + MSCs, 5) Empty defect	4 and 12 weeks	Alginate hydrogel (ultra-purified sodium alginate and commercial grade sodium alginate)		Macroscopic evaluation, Histology, Semi-quantitative histological scoring, Biomechanical tests	√	X	Excluded from meta-analysis → No standard deviations available
Igarashi110	2012	Dogs	Beagle	12	F	-	~ 20 kg	Trochlea	Size: 5 mm / Depth: 5 mm	1) Alginate hydrogel, 2) Alginate hydrogel + MSCs, 3) Empty defect	4 and 12 weeks	Alginate hydrogel		Macroscopic evaluation, Semi-quantitative macroscopic evaluation, Histology, Semi-quantitative histological scoring, Biomechanical tests	√
Ikemura111	2015	Rabbits	Japanese White	27	F	12 weeks	2.5 kg	Trochlea	Size: 4 mm / Depth: 4 mm	1) Gellan-gellan-sulfate scaffold, 2) Gellan-gellan-sulfate scaffold + 10 ug/ml tenascin-C, 3) Gellan-gellan-sulfate scaffold + 100 ug/ml tenascin-C	12 weeks	Gellan-gellan-sulfate scaffold	Tenascin-C	Macroscopic evaluation, Semi-quantitative macroscopic evaluation, Histology, Immunohistochemistry, Semi-quantitative histological scoring	X
Im112	2010	Minipigs	-	16	F	23 - 25 months	50.5 ± 0.75 kg	Medial and lateral condyle	Size: 6 mm / Depth: 7 mm	1) Scaffold, 2) Scaffold + chondrocytes, 3) Osteochondral fragment, 4) ACI, 5) Empty defect	14, 26 and 52 weeks	β-TCP-hydroxyapatite/Hyaluronic acid-atelocollagen		Macroscopic evaluation, Semi-quantitative macroscopic evaluation, Histology, Immunohistochemistry, Semi-quantitative histological scoring, Biomechanical tests	√
Im113	2010	Rabbits	New Zealand White	12	-	12 - 18 months	3.38 ± 0.12 kg	Trochlea	Size: 6 mm / Depth: 3 mm	1) PCL-pluronic F127-heparin, 2) PCL-pluronic F127-heparin + ASCs, 3) PCL-pluronic F127-heparin + BMP-2 + TGF-β2, 4) PCL-pluronic F127-heparin + BMP-2 + TGF-β2 + ASCs	4 and 12 weeks	PCL-pluronic F127-heparin	TGF-β2, BMP-7	Macroscopic evaluation, Semi-quantitative macroscopic evaluation, Histology, Immunohistochemistry, Semi-quantitative histological scoring	X
Intzoglou114	2014	Rabbits	New Zealand White	30	M	3 months	3.8 kg (range: 3.5 - 4 kg)	Trochlea	Size: 4.5 mm / Depth: 7 mm	1) TruFit, 2) Mosaicplasty, 3) Empty defect	6 months	TruFit (polylactide-co-glycolide, calcium sulfate and polyglycolide fibers)		Macroscopic evaluation, Semi-quantitative macroscopic evaluation, Histology, Immunohistochemistry, Semi-quantitative histological scoring	√
Ishii115	2007	Rabbits	Japanese White	36	M	15 - 16 weeks	3 - 3.4 kg	Trochlea	Size: 5 mm / Depth: 4 mm	1) Fibrin, 2) Fibrin + FGF-2 (18.3 ng), 3) Fibrin + FGF-2 (183 ng), 4) Fibrin + FGF-2 (917 ng), 5) Fibrin + FGF-2 (1834 ng), 6) Empty defect	6 months	Fibrin	FGF-2	Histology, Immunohistochemistry, Semi-quantitative histological scoring	√
Ito116	2008	Rabbits	Japanese White	12	M	12 weeks	2 kg (avg)	Trochlea	Size: 4 mm / Depth: 6 mm	1) Calcium hydroxyapatite/Atelocollagen, 2) Calcium hydroxyapatite/Atelocollagen + chondrocytes	6 months	Calcium hydroxyapatite/Atelocollagen		Macroscopic evaluation, Semi-quantitative macroscopic evaluation, Histology, Immunohistochemistry, Semi-quantitative histological scoring	X
Ito117	2005	Rabbits	Japanese White	12	M	12 weeks	2 kg (avg)	Trochlea	Size: 4 mm / Depth: 4 mm	1) Atelocollagen scaffold/Atelocollagen hydrogel + PLA mesh, 2) Atelocollagen scaffold/Atelocollagen hydrogel + PLA mesh + chondrocytes	2 (arthroscopy) and 6 months	Atelocollagen scaffold/Atelocollagen hydrogel + PLA mesh		Macroscopic evaluation, Semi-quantitative macroscopic evaluation, Histology, Immunohistochemistry, Semi-quantitative histological scoring	X
Jagodzinski118	2014	Minipigs	Göttingen	11	F	14 months	58.3 ± 6.7 kg	Medial and lateral condyle	Size: 7 mm / Depth: 10 mm	1) Conical bone cylinder/Type I-III collagen membrane, 2) Reverse osteochondral cylinders without cartilage layer, 3) Conical bone cylinder/Type I-III collagen membrane + BMAC, 4) Empty defect	4, 8 and 12 week	Conical bone cylinder/Type I-III collagen membrane (Chondrogide®)		Macroscopic evaluation, Semi-quantitative macroscopic evaluation, Immunohistochemistry, Semi-quantitative histological scoring, Biomechanical tests	√
Jang119	2014	Rabbits	New Zealand White	28	-	Adult	3.464 kg ± 441 gram	Trochlea	Size: 6 mm / Depth: 8 mm	1) Hydroxyapatite, 2) Hydroxyapatite + platelet-rich fibrin glue, 3) Hydroxyapatite + platelet-rich fibrin glue + MSCs, 4) Hydroxyapatite + platelet-rich fibrin glue + differenation MSCs, 5) Empty defect	8 and 20 weeks	Hydroxyapatite ± platelet-rich fibrin glue		Macroscopic evaluation, Histology, Semi-quantitative histological scoring	√
Jansen120	2009	Rabbits	New Zealand White	9	F	6 months	3.2 - 4.4 kg	Medial condyle	Size: 4 mm / Depth: 4 mm	1) PEOT/PBT (55/45), 2) PEOT/PBT (70/30), 3) Empty defect	1 and 3 months	PEOT/PBT		Macroscopic evaluation, Histology, Semi-quantitative histological scoring	√
Jansson121	2000	Rabbits	Chinchilla Bastard	9	M/F	1 year	3 - 4 kg	Medial condyle	Size: 4 mm / Depth: 6 mm	1) PLA/Polyglactin-Polydioxanan, 2) Empty defect	1, 2, 3, 4, 8, 12 and 24 weeks	PLA/Polyglactin-Polydioxanan		Macroscopic evaluation, Histology, Immunohistochemistry	X
Jiang122	2007	Minipigs	Lee-Sung	10	M/F	7 - 9 months	-	Medial and lateral condyle	Size: 8 mm / Depth: 8 mm	1) PLGA-β-TCP/PLGA, 2) PLGA-β-TCP/PLGA + chondrocytes, 3) Empty defect	24 weeks	PLGA-β-TCP/PLGA		Macroscopic evaluation, Semi-quantitative macroscopic evaluation, Histology, Immunohistochemistry, Semi-quantitative histological scoring, Biomechanical tests, X-ray	√	X	Excluded from meta-analysis → Missing empty defect results
Jiang123	2010	Dogs	-	20	M/F	2 - 3 years	15 kg	Lateral condyle	Size: 5 mm / Depth: 6 mm	1) Porous hydroxyapatite-polyamide 66/Polyurethane, 2) Compact hydroxyapatite-polyamide 66/Polyurethane, 3) Hydroxyapatite-polyamide 66, 4) Empty defect	1 and 21 days	Hydroxyapatite-polyamide 66/Polyurethane, Hydroxyapatite-polyamide 66		Macroscopic evaluation, Histology, Semi-quantitative histological scoring, SEM	√	X	Excluded from meta-analysis → Maximum score in the study results exceeded the maximum score according to the score described in reference
Jiang124	2013	Rabbits	New Zealand White	- (if unilateral surgergy: 36; bilateral surgery: 18)	M	Adult	2.5 - 3 kg	Trochlea	Size: 4 mm / Depth: 3 mm	1) Type I collagen scaffold, 2) Type I collagen scaffold + PVP-1, 3) Empty defect	4 and 24 weeks	Type I collagen scaffold	Polyvinylpyrrolidone-iodine	Macroscopic evaluation, Semi-quantitative macroscopic evaluation, Histology, Semi-quantitative histological scoring, µCT	√
Jing125	2008	Rabbits	New Zealand White	34	-	24 weeks	3.5 - 4.5 kg	Medial and lateral condyle	Size: 3.5 mm / Depth: 3 cm	1) Chitosan-glycerol phosphate-demineralized bone matrix, 2) Empty defect	4, 12 and 24 weeks	Chitosan-glycerol phosphate-demineralized bone matrix		Macroscopic evaluation, Histology, Semi-quantitative histological scoring	√	X	Excluded from meta-analysis → Maximum score in the study results exceeded the maximum score according to the score described in reference
Jung126	2006	Minipigs	-	20	F	18 - 39 months (avg: 22.7)	21 - 46 kg (avg: 34.1)	Medial condyle	Size: 6.3 mm / Depth: 10 mm	1) Type I collagen-hyaluronate scaffold, 2) Type I collagen-hyaluronate scaffold + rhGDF-5, 3) Empty defect	10 weeks	Type I collagen-hyaluronate scaffold	rhGDF-5	Macroscopic evaluation, Semi-quantitative macroscopic evaluation, Histology, Semi-quantitative histological scoring	√
Jung127	2012	Rabbits	New Zealand White	8	M	4 months	3 - 3.5 kg	Trochlea	Size: 2 mm / Depth: 3 mm	1) PLGA, 2) PLGA + BMP-7	4, 8 and 12 weeks	PLGA	BMP-7	Macroscopic evaluation, Histology, Immunohistochemistry	X
Jurgens128	2013	Goats	Dutch milk	8	F	Adult	82.4 ± 11.7 kg	Medial condyle and trochlea	Size: 5 mm / Depth: 3.5 mm	1) Type I-III collagen scaffold, 2) Type I-III collagen scaffold + SVF, 3) Type I-III collagen scaffold + ASCs	4 months	Type I-III collagen scaffold (OptimaixR)		Macroscopic evaluation, Semi-quantitative macroscopic evaluation, Histology, Immunohistochemistry, Semi-quantitative histological scoring, Biochemical assays, PCR, Biomechanical tests, µCT	X
Kandel129	2006	Sheeps	-	18	-	-	-	Trochlea	Size: 4 mm / Depth: 6 mm	1) Calcium phosphate, 2) Calcium phosphate + chondrocytes	4, 8 and 12 weeks	Calcium phosphate		Macroscopic evaluation, Histology, Immunohistochemistry, Biochemical assays, X-ray, backscatter electon imaging	X
Kang130	2014	Rabbits	New Zealand	22	-	6 months	4 kg	Trochlea	Size: 4 mm / Depth: 2 mm	1) Cartilage extracellular matrix-derived scaffold, 2) Cartilage extracellular matrix-derived scaffold + ADSCs, 3) Empty defect	1, 3, 6 and 9 months	Cartilage extracellular matrix-derived scaffold		Macroscopic evaluation, Semi-quantitative macroscopic evaluation, Histology, Immunohistochemistry, Semi-quantitative histological scoring, Biochemical assays and biomechanical tests (cellular biomaterial only)	√
Karagianes131	1975	Goats	African Pygmy	- (17?)	-	1 - 3 years	20 - 30 kg	Femoral condyle	Size: - mm / Depth: - mm	1) 50% dense void-metal composite titanium alloy	4, 8 and 12 weeks	50% dense void-metal composite titanium alloy		Macroscopic evaluation, Histology	X
Kawaguchi132	2011	Rabbits	Japanese White	32	F	Adult	3.9 ± 0.5 kg	Trochlea	Size: 4.3 mm / Depth: 3 mm	1) Non-crosslinked porcine atelocollagen scaffold, 2) Crosslinked porcine atelocollagen scaffold, 3) Crosslinking salmon atelocollagen scaffold, 4) Empty defect	24 weeks	Atelocollagen scaffold (salmon-derived and porcine-derived)		Macroscopic evaluation, Semi-quantitative macroscopic evaluation, Histology, Immunohistochemistry, Semi-quantitative histological scoring, PCR	√
Kayakabe133	2006	Rabbits	Japanese White	27	-	36 - 38 weeks	-	Trochlea	Size: 5 mm / Depth: 2 - 3 mm	1) Hyaluronic acid scaffold, 2) Hyaluronic acid scaffold + MSCs, 3) Hyaluronic acid scaffold + MSCs + FGF-2, 4) Atellocollagen hydrogel + MSCs + FGF-2, 5) Empty defect	12 weeks	Hyaluronic acid scaffold, Atellocollagen hydrogel		Macroscopic evaluation, Histology, Immunohistochemistry, Semi-quantitative histological scoring	√
Kazemi134	2014	Dogs	Mixed breed	12	-	Adult	20 - 30 kg	Medial and lateral condyle	Size: 6 mm / Depth: 5 mm	1) Platelet rich fibrin, 2) Empty defect	4, 8 and 12 weeks	Platelet rich fibrin		Macroscopic evaluation, Semi-quantitative macroscopic evaluation, Histology, Semi-quantitative histological scoring	√
Kim135	2013	Rabbits	New Zealand White	24	-	6 months	-	Medial condyle	Size: 3 mm / Depth: 3 mm	1) OPF + GMP (10 mM)/OPF + GMP (10 mM) + GMP (40 mM), 2) OPF + GMP (10 mM)/OPF + GMP (10 mM) + GMP (40 mM)+IFG-1, 3) OPF + GMP (10 mM)/OPF + TGF-β3 + GMP (10 mM) + GMP (40 mM)+IFG-1, 4) OPF + GMP (10 mM)/OPF + GMP (10 mM)+TGF-β3 + GMP (40 mM)+IGF-1	4 and 12 weeks	OPF hydrogel-GMP	IGF-1, TGF-β3	Histology, Semi-quantitative histological scoring	X
Kirker-Head136	2006	Goats	Nubian	6	M	3 years	55 - 73 kg	Medial condyle	Size: 4.5 mm / Depth: 4 mm	1) HemiCAP, 2) Sham (unoperated joint)	3, 6, 12 and 24 weeks	HemiCAPTM(superscript) (Titanium alloy anchoring screw + Co-Cr alloy resurfacing implant) Femoral Resurfacing Prosthesis (titanium alloy anchoring screw and a Co–Cr alloy resurfacing prosthesis)		Macroscopic evaluation, Histology, Semi-quantitative histological scoring, arthroscopy, X-ray, synovial fluid analyses	X
Kitamura137	2011	Rabbits	Japanese White	74	F	Adult	3.6 ± 0.4 kg	Trochlea	Size: 4.3 mm / Depth: 10 mm	1) PAMPS-PDMAAm DN gel, 2) Empty defect	1 day, 6.5 months	PAMPS-PDMAAm DN gel		Macroscopic evaluation, Semi-quantitative macroscopic evaluation, Histology, Immunohistochemistry, Semi-quantitative histological scoring, PCR, Surface roughness	√
Kon138	2010	Sheeps	Bergamasca-Massese	12	F	3 - 4 years	70 ± 5 kg	Femoral condyle	Size: 7 mm / Depth: 9 mm	1) Scaffold, 2) Scaffold + chondrocytes, 3) Empty defect	1, 3 and 6 months	Hydroxyapatite(70%)-type I collagen(30%)/Hydroxyapatite(40%)-type I collagen(60%)/Type I collagen (Fin-Ceramica®)		Macroscopic evaluation, Semi-quantitative macroscopic evaluation, Histology, Immunohistochemistry, Semi-quantitative histological scoring, X-ray	√
Kon139	2010	Sheeps	Bergamasca-Massese	12	F	Adult	70 ± 5 kg	Medial and lateral condyle	Size: 7 mm / Depth: 9 mm	1) Scaffold, 2) Scaffold + PRP, 3) Empty defect	1, 3, 6 and 12 months	Hydroxyapatite(70%)-type I collagen(30%)/Hydroxyapatite(40%)-type I collagen(60%)/Type I collagen	PRP	Macroscopic evaluation, Semi-quantitative macroscopic evaluation, Histology, Immunohistochemistry, Semi-quantitative histological scoring, X-ray	√
Kon140	2013	Goats	Saanen	14	-	Adult	55 ± 11 kg	Medial and lateral condyle	Size: 6 mm / Depth: 8 mm	1) Aragonite, 2) Aragonite + channels cartilage phase, 3) Aragonite + channels bone phase, 4) Empty defect	3 months	Aragonite ± hyaluronic acid		Macroscopic evaluation, Semi-quantitative macroscopic evaluation, Histology, Immunohistochemistry, Semi-quantitative histological scoring	√
Kon141	2009	Horse	Standard-bred trotters	2	M	6 and 7 years	410 and 430 kg	Medial condyle	Size: 10 mm / Depth: 8 - 10 mm	1) Hydroxyapatite(40%)-type I collagen(60%)/Type I collagen (chondral defect), 2)Hydroxyapatite(70%)-type I collagen(30%)/Hydroxyapatite(40%)-type I collagen(60%)/Type I collagen	4 and 12 weeks	Hydroxyapatite(70%)-type I collagen(30%)/Hydroxyapatite(40%)-type I collagen(60%)/Type I collagen (Fin-Ceramica®)		Macroscopic evaluation, Semi-quantitative macroscopic evaluation, Histology, Semi-quantitative histological scoring, Biomechanical tests, Arthroscopy	X
Kon142	1981	Rabbits	Chinchilla	25	-	Young (# 15), adult (# 10)	-	Lateral tibial plateau	Size: 3 mm / Depth: 2 mm	1) Poly(2-hydroxyethyl methacrylate) hydrogel; pore size: 50 um, 2) Poly(2-hydroxyethyl methacrylate) hydrogel; pore size: 100 um	4 weeks	poly(2-hydroxyethyl methacrylate) hydrogel		Macroscopic evaluation, Histology	X
Köse143	2005	Rabbits	Albino	20	-	4 months	3.25 kg	Trochlea	Size: 4.5 mm / Depth: 4 mm	1) Collagen-calcium phosphate scaffold, 2) Collagen-calcium phosphate scaffold + chondrocytes, 3) PHBV, 4) PHBV + chondrocytes	6, 12, 24 and 48 weeks	Collagen-calcium phosphate scaffold (CaP-Gelfix®), PHBV		Macroscopic evaluation, Semi-quantitative macroscopic evaluation, Histology, Semi-quantitative histological scoring	X
Krych144	2013	Rabbits	New Zealand White	14	M	Adult	2.5 - 3 kg	Trochlea	Size: 3.5 mm / Depth: 4 mm	1) PVA scaffold + collagenase type II treatment, 2) PVA + saline treatment	6 and 12 months	PVA scaffold		Macroscopic evaluation, Semi-quantitative macroscopic evaluation, Histology, Immunohistochemistry, Semi-quantitative histological scoring, Biomechanical tests	X
Kubo145	2007	Rabbits	Japanese White	53	-	13 weeks	2.5 - 3 kg	Trochlea	Size: 5 mm / Depth: 5 mm	1) Collagen hydrogel, 2) Empty defect	4, 8 and 12 weeks	Type I collagen hydrogel		Histology, Immunohistochemistry, Semi-quantitative histological scoring, Electron microscopy	√
Kuo146	2006	Rabbits	New Zealand White	15	M	15 weeks	2.5 - 3 kg	Trochlea	Size: 2 x 7 mm / Depth: Full-thickness cartilage defect + microfracture (Size: 1.5 mm / Depth: 3 mm, 2 penetrations/defect)	1) BMP-7, 2) Microfracture, 3)Microfracture + type I collagen scaffold, 4) Microfracture + type I collagen scaffold+BMP-7, 5) Empty defect	6 and 12 weeks	Type I collagen scaffold	BMP-7	Macroscopic evaluation, Semi-quantitative macroscopic evaluation, Histology	X
Lafantaisie-Favreau147	2013	Rabbits	New Zealand White	5	M/F	30 months	4.68 ± 0.44 kg	Trochlea	Size: 1.4 mm / Depth: 2 mm	1) 10K chitosan-NaCl-blood, 2) 40K chitosan-NaCl-blood, 3) 150K chitosan-NaCl-blood, 4) Tissue factor, 5) Empty defects	1, 7 and 14 days	Chitosan-NaCl-blood hydrogel		Macroscopic evaluation, Histology, Immunohistochemistry, µCT	X
Lebourg148	2014	Rabbits	New Zealand White	28	M	Adult	2.5 - 3 kg	Trochlea	Size: 3 mm / Depth: 0.8 - 1 mm	1) PCL, 2) PCL-hyaluronic acid, 3) Empty defect	12 weeks	PCL, PCL-hyaluronic acid		Macroscopic evaluation, Semi-quantitative macroscopic evaluation, Histology, Immunohistochemistry	X
Lee149	2012	Rabbits	New Zealand White	30	M	8 months	3.5 - 4 kg	Trochlea	Size: 4 mm / Depth: 3 mm	1) Type I collagen-hyaluronic acid-fibrinogen hydrogel, 2) Type I collagen-hyaluronic acid-fibrinogen hydrogel + SDMSCs, 3) Empty defect	1, 2, 3, 4, 8 and 12 weeks	Type I collagen-hyaluronic acid-fibrinogen hydrogel		Macroscopic evaluation, Semi-quantitative macroscopic evaluation, Histology, Immunohistochemistry, Semi-quantitative histological scoring	√
Lee150	2013	Rabbits	New Zealand White	81	M	10 months	4 - 4.5 kg	Trochlea	Size: 4 mm / Depth: 3 mm	1) PRP hydrogel, 2) PRP hydrogel + SDMSCs, 3) Empty defect	1, 2, 3, 4 and 8 weeks	PRP hydrogel	PRP	Macroscopic evaluation, Semi-quantitative macroscopic evaluation, Histology, Immunohistochemistry, Semi-quantitative histological scoring, Biochemical assays	√	X	Excluded from meta-analysis → Maximum score in the study results exceeded the maximum score according to the score described in reference
Lee151	2014	Rabbits	New Zealand White	20	-	20 weeks	3.4 - 3.8 kg	Trochlea	Size: 7 mm / Depth: 2 mm	1) PLGA-Pluronic F127, 2) PLGA-Pluronic F127 + MSCs, 3) PLGA-Pluronic F127-PD98059 + MSCs, 4) PLGA-Pluronic F127-TGF-β2 + MSCs	6 and 12 weeks	PLGA-Pluronic F127		Macroscopic evaluation, Semi-quantitative macroscopic evaluation, Histology, Immunohistochemistry, Semi-quantitative histological scoring	X
Li152	2008	Rabbits	New Zealand White	36	M/F	4 - 6 months	2.5 - 3.5 kg	Trochlea	Size: 4 mm / Depth: 3 mm	1) CDBM, 2) CDBM + MSCs, 3) Empty defect	12 weeks	Cancellous demineralized bone matrix		Macroscopic evaluation, Immunohistochemistry, Semi-quantitative histological scoring	√	X	Excluded from meta-analysis → Exclude, maximum score scoring system unknown. The paper describes the use of the scoring system described in reference 2, however, this reference does not contain histological scoring
Li153	2015	Rabbits	New Zealand White	14	-	4 - 6 months	2.5 - kg	Trochlea	Size: 4 mm / Depth: 2 mm	1) Poly(3-hydroxybutyrate-co-4-hydroxybutyrate), 2) Poly(3-hydroxybutyrate-co-4-hydroxybutyrate) + TGF-b1, 3) Poly(3-hydroxybutyrate-co-4-hydroxybutyrate) + ASCs + chondrocytes, 4) Empty defect	Pilot: 6 and 12 weeks. Experiment: 15 weeks	Poly(3-hydroxybutyrate-co-4-hydroxybutyrate)		Histology, Immunohistochemistry	X
Li154	2015	Rabbits	New Zealand White	30	-	-	2.5 kg	Trochlea	Size: 4 mm / Depth: 6 mm	1) Hydroxyapatite-polyamide-6/PVA-gelatin-vanillin, 2) Hydroxyapatite-polyamide-6/PVA-gelatin-vanillin + MSCs, 3) Empty defect	12 weeks	Hydroxyapatite-polyamide-6/PVA-gelatin-vanillin		Macroscopic evaluation, Histology, Semi-quantitative histological scoring, PCR	√
Lim155	2013	Minipigs	Prestige World Genetics	6	F	8 months	20 kg	Medial and lateral condyle	Size: 6 mm / Depth: 1 mm	1) OPF scaffold, 2) OPF scaffold + MSCs	12 weeks	OPF scaffold		Macroscopic evaluation, Histology, Immunohistochemistry, Semi-quantitative histological scoring, Histomorphometry	X
Lin156	2006	Rabbits	New Zealand	27	M/F	3 - 4 months	??????????	Medial condyle and trochlea	Size: 5 mm / Depth: 3 mm	1) Collagen membrane, 2) Collagen membrane + MSCs, 3) Empty defect	1, 3, 6, 12 and 24 weeks	Collagen membrane		Macroscopic evaluation, Semi-quantitative macroscopic evaluation, Histology, Immunohistochemistry, Semi-quantitative histological scoring, SEM	√		Article in Chinese, excluded for methodological quality assessment
Liu157	2010	Rabbits	New Zealand	30	M/F	6 months	1.4 - 1.7 kg	Intercondylar fossa	Size: 4 x 4 mm / Depth: 3 mm	1) PLGA-hydroxyapatite/Type I collagen hydrogel, 2) PLGA-hydroxyapatite/Type I collagen hydrogel + MSCs, 3) Empty defect	16 weeks	Hydroxyapatite-type I collagen hydrogel/PLGA-type I collagen hydrogel		Macroscopic evaluation, Histology, Immunohistochemistry, Histomorphometry, µCT	X
Liu158	2006	Rabbits	New Zealand White	36	-	4 months	2.6 - 3 kg	Trochlea	Size: 5 mm / Depth: 5 mm	1) Hyaluronic acid-gelatin hydrogel, 2) MSCs, 3) Hyaluronic acid-gelatin hydrogel + MSCs, 4) Empty defect	3 and 6 months	Hyaluronic acid-gelatin hydrogel		Macroscopic evaluation, Histology, Semi-quantitative histological scoring	√	X	Excluded from meta-analysis → No standard deviations available
Liu159	2014	Rabbits	New Zealand	39	-	Adult	2.5 - 3 kg	Trochlea	Size: 5 mm / Depth: 3 mm	1) PCL-gelatin scaffold, 2) PCL-gelatin scaffold + induced pluripotent stem cells, 3) Empty defect	16 weeks	PCL-gelatin scaffold		Macroscopic evaluation, Histology, PCR, µCT, Western Blot	X
Liu160	2014	Rabbits	New Zealand	24	M/F	4 months	4 ± 0.8 kg	Femoral condyle	Size: 4 mm / Depth: 3 mm	1) Human acellular amniotic membrane, 2) Human acellular amniotic membrane + MSCs, 3) Empty defect	6 months	Human acellular amniotic membrane		Macroscopic evaluation, Histology, Semi-quantitative histological scoring	√
Lohan161	2014	Rabbits	New Zealand White	27	F	12 months	-	Trochlea	Size: 3.5 mm / Depth: 2.7 mm	1) PGA, 2) PGA + auricular chondrocytes, 3) PGA + articular chondrocytes, 4) Empty defect	2, 4, 12, 26 and 52 weeks	PGA		Macroscopic evaluation, Semi-quantitative macroscopic evaluation, Histology, Immunohistochemistry, Semi-quantitative histological scoring, Biomechanical tests	√
Loken162	2008	Rabbits	New Zealand White	12	-	24 weeks	3.9 ± 0.4	Medial condyle	Size: 4 mm / Depth: 1.5 mm	1) HYAFF-11, 2) HYAFF-11 + MSCs	4 weeks	Hyaluronan scaffold (HYAFF-11®)		Macroscopic evaluation, Histology, Semi-quantitative histological scoring, Histomorphometry	X
Lopiz-Morales163	2010	Rabbits	New Zealand White	26	-	5 months	2.3 - 29.9 kg	Medial condyle	Size: 4 mm / Depth: 5 mm	1) Alginate, 2) Alginate + MSCs, 3) Alginate + BMP-2, 4) Alginate + BMP-4, 5) Alginate + MSCs + BMP-2, 6) Alginate + MSCs + BMP-4, 7) Alginate + BMP-2 + BMP-4, 8) Empty defect, 9) Untreated knees	1, 4 and 8 weeks	Alginate hydrogel	BMP-2, BMP-4	Macroscopic evaluation, Histology, Histomorphometry	X
Lu164	2005	Rabbits	-	20	M/F	7 - 14 months	2.1 - 3 kg (avg: 2.6)	Condyle	Size: 3 mm / Depth: 2.5 mm	1) Hydroxyapatite-PVA, 2) Empty defect	1, 4, 12 and 24 weeks	Hydroxyapatite-PVA hydrogel		Macroscopic evaluation, Histology	X
Lu165	2014	Rabbits	New Zealand White	36	M	Adult	-	Medial condyle	Size: 3 mm / Depth: 3 mm	1) OPF-gelatin microspheres-IGF-1/OPF-gelatin microspheres, 2) OPF-gelatin microspheres/OPF-gelatin microspheres-BMP-2, 3) OPF-gelatin microspheres-IGF-1/OPF-gelatin microspheres-BMP-2	2, 4, 12 and 24 weeks	OPF-gelatin microspheres hydrogel/OPF-gelatin microspheres hydrogel	IGF-1, BMP-2	Histology, Semi-quantitative histological scoring, µCT	X
Lubiatowski*166	2006	Rabbits	New Zealand White	28	-	4 months	3.5 kg	Distal femur	Size: 4 mm / Depth: 3 mm	1) Type I collagen scaffold, 2) Empty defect	2, 4, 8, 12 and 24 weeks	Type I collagen scaffold (Duragen®)		Macroscopic evaluation, Semi-quantitative macroscopic evaluation, Histology, Immunohistochemistry, Semi-quantitative histological scoring	√
Luo167	2015	Rabbits	-	24	-	16 weeks	3 - 3.5 kg	Trochlea	Size: 3 mm / Depth: 3 mm	1) Silk fibroin, 2) TGF-β3 modified functionalized silk fibroin, 3) TGF-β3 and mechano growth factor functionalized silk fibroin, 4) Empty defect	3 weeks and 6 months	Silk fibroin	mechano growth factor, TGF-β3	Histology, Semi-quantitative histological scoring	√	X	Excluded from meta-analysis → Missing empty defect results
Maehara168	2010	Rabbits	Japanese White	96	M	Adult	2.7 - 3.5 kg	Trochlea	Size: 5 mm / Depth: 5 mm	1) Atellocollagen-hydroxyapatite hydrogel, 2) Atellocollagen-hydroxyapatite hydrogel + FGF-2 (10 µg/ml), 3) Atellocollagen-hydroxyapatite hydrogel + FGF-2 (100 µg/ml), 4) Empty defect	4 and 12 weeks	Atellocollagen-hydroxyapatite hydrogel	FGF-2	Macroscopic evaluation, Immunohistochemistry, Semi-quantitative histological scoring, µCT	√
Marchand169	2012	Rabbits	New Zealand White	11	M/F	8 and 11 months	-	Trochlea	Size: 3.5 x 4.5 mm / Depth: Full-thickness cartilage defect + microfacture (Size: 0.5 and 0.9 mm / Depth: 3 - 4 mm, 2 and 6 penetrations/defect, respectively)	1) Chitosan-glycerol phosphate-blood hydrogel + thrombin, 2) Chitosan-glycerol phosphate-rhodamine isothiocyanate, 3) Trombin	4 and 12 weeks	Chitosan-glycerol phosphate-blood hydrogel, Trombin		Macroscopic evaluation, Histology, Immunohistochemistry, Semi-quantitative histological scoring, µCT, Histomorphometry	X
Marmotti170	2012	Rabbits	New Zealand White	50	-	< 16 weeks	-	Trochlea	Size: 4.5 mm / Depth: 4 mm	1) Hyaluronic acid + PRP/Cartilage/Hyaluronic acid + PRP, 2) HA + PRP/Cartilage-fibrin glue/Hyaluronic acid + PRP, 3) Hyaluronic acid + PRP/Fibrin glue/Hyaluronic acid + PRP, 4) Hyaluronic acid + PRP/Hyaluronic acid + PRP, 5) Empty defect	Experiment 1: 3 - 4 months, Experiment 2: 9 months	Hyaluronic acid (Hyaff-11®)/± fibrin glue/Hyaluronic acid	PRP	Macroscopic evaluation, Semi-quantitative macroscopic evaluation, Histology, Immunohistochemistry, Semi-quantitative histological scoring	√
Marmotti171	2013	Goats	Roccaverano	18	F	Adult	-	Trochlea	Size: 7 mm / Depth: 3.5 mm	1) Platelet-rich fibrin matrix/Fibrin glue/Hyaluronic acid, 2) Platelet-rich fibrin matrix/Fibrin glue + cartilage fragment/Hyaluronic acid, 3) Empty defect	4 weeks	Platelet-rich fibrin matrix/Fibrin glue ± cartilage fragment/Hyaluronic acid		Macroscopic evaluation, Semi-quantitative macroscopic evaluation, Histology, Immunohistochemistry, Semi-quantitative histological scoring, Biomechanical tests	√
Martinez-Carranza172	2014	Sheeps	Swedish landrace	10	F	4 years (avg, range: 2 - 6 years)	74.4 kg (avg, range: 62 - 90 kg)	Medial condyle	Implant size: 7.5 mm / depth:	1) Cobalt-chrome implant + titanium and hydroxyapatite coating	4, 8 and 12 weeks	Cobalt-chrome implant + titanium and hydroxyapatite coating		Macroscopic evaluation, Semi-quantitative macroscopic evaluation, Histology, Semi-quantitative histological scoring, Histomorphometry, SEM, µCT	X
Martinez-Diaz173	2010	Rabbits	New Zealand White	26	M	Adult	2.5 - 3 kg	Trochlea	Size: 3 mm / Depth: 1 - 2 mm	1) PCL (Subchondral injury), 2) PCL (chondral defect), 3) PCL + chondrocytes (chondral defect), ACI (chondrocyte pellets), 5) Empty defect (Subchondral injury)	6 and 12 weeks	PCL		Macroscopic evaluation, Histology, Immunohistochemistry, Biomechanical tests	X
Martins174	2014	Horse	Mangalarga	6	-	3 years	300 - 315 kg	Trochlea talus	Size: 1 cm / Depth: 0.5 cm	1) Chitosan-glycerol phosphate hydrogel, 2) Empty defect	8, 16 and 32 weeks	Chitosan-glycerol phosphate hydrogel		Macroscopic evaluation, Histology, Immunohistochemistry, Histomorphometry, Metabolic labelling	X
Masuoka175	2006	Rabbits	Japanese White	18	M	16 - 18 weeks	3 kg (avg)	Trochlea	Size: 4 mm / Depth: 2 mm	1) Type I atellocollagen scaffold/Type I atellocollagen membrane, 2) Type I atellocollagen scaffold/Type I atellocollagen membrane + ASCs, 3) Empty defect	2 and 4 weeks	Type I atellocollagen scaffold/Type I atellocollagen membrane		Macroscopic evaluation, Semi-quantitative macroscopic evaluation, Immunohistochemistry, Semi-quantitative histological scoring	√
Matsuda176	2013	Rabbits	Japanese White	28	F	6 months	3.6 ± 0.7 kg	Trochlea	Size: 4.3 mm / Depth: 2, 3 or 4 mm	Exp 1 (each group 2, 3, or 4 mm deep): 1) 0.5 mm hydrogel sheet, 2) 1 mm hydrogel sheet, 3) 5 mm hydrogel sheet, 4) Empty defect. Exp 2 (each group 2 mm deep): 1) 0.5 mm hydrogel sheet, 2) 1 mm hydrogel sheet, 3) 5 mm hydrogel sheet, 4) Empty defect	2, 6, 12 and 24 weeks	PAMPS-PDMAAm DN hydrogel		Macroscopic evaluation, Semi-quantitative macroscopic evaluation, Histology, Immunohistochemistry, Semi-quantitative histological scoring, PCR	√
Mazaki177	2014	Rabbits	New Zealand White	38	F	-	2 - 2.5 kg	Medial condyle	Size: 3 mm / Depth: 3 mm	Exp 1: 1) Gelatin, 2) Gelatin + BMP-4, 3) Gelatin + CBD-BMP-4, 4) Empty defect. Exp 2: 1) Gelatin, 2) Gelatin + MSCs, 3) Empty defect	2, 6, 12 and 24 weeks	Furfurylamine-conjugated gelatin hydrogel	BMP4 and CBD-BMP4	Macroscopic evaluation, Semi-quantitative macroscopic evaluation, Histology, Immunohistochemistry, Semi-quantitative histological scoring, µCT, PCR	√
Messner178	1993	Rabbits	New Zealand White	22	-	Adult	3.2 - 3.8 kg	Medial condyle	Size: 3 mm / Depth: 3 mm	1) Hydroxylapatite/Dacron, 2) Hydroxylapatite/Dacron + autologous periosteum	6 and 12 weeks	Hydroxylapatite/Dacron		Macroscopic evaluation, Histology, Semi-quantitative histological scoring, Biomechanical tests	X
Messner179	1994	Rabbits	New Zealand White	25	-	Adult	3.2 - 3.8 kg	Medial condyle	Size: 3 mm / Depth: 3 mm	1) Teflon, 2) Dacron, 3) Arthrotomy, 4) Periostial graft, 5) Empty defect	6 weeks, 6 and 12 months	Dacron, Teflon		Macroscopic evaluation, Histology, Immunohistochemistry, Semi-quantitative histological scoring, Biomechanical tests	√
Miao180	2008	Rabbits	New Zealand White	27	M/F	Adult	1.5 - 2 kg	Femoral condyle	Size: 5 mm / Depth: 3 mm	1) Silk fibroin, 2) Silk fibroin + MSCs, 3) Empty defect	8 weeks	Silk fibroin		Histology, Immunohistochemistry	X
Mierisch181	2002	Rabbits	New Zealand White	33	-	-	-	Trochlea	Size: 3 x 4 mm / Depth: 3 mm	1) Alginate hydrogel, 2) Alginate hydrogel + TGF-β (20 ng/ml), Alginate hydrogel + TGF-β (2000 ng/ml), 4) Empty defect	4, 8 and 12 weeks	Alginate hydrogel	TGF-β	Macroscopic evaluation, Semi-quantitative macroscopic evaluation, Histology, Semi-quantitative histological scoring	√
Miljkovic182	2009	Rats	Long-Evans	24	F	6 weeks	-	Trochlea	Size: 1.5 mm / Depth: 1.35 mm	1) PEG-diamine-genipin hydrogel, 2) PEG-diamine-genipin hydrogel + Vetbond	3 days, 2, 4 and 4 weeks	PEG-diamine-genipin hydrogel ± cyanoacrylate-based surgical sealant (Vetbond)		Macroscopic evaluation, Histology	X
Miller183	2010	Rabbits	New Zealand White	12	F	11 months (avg)	4.7 kg (avg)	Trochlea	Size: 3 mm / Depth: 2 mm	1) KLD hydrogel, 2) KLD hydrogel + chondrogenic factors, 3) KLD hydrogel + chondrogenic factors + MSCs, 4) Empty defect	6 weeks and 6 months	KLD hydrogel	TGF-β1, streptavidine, dexamethasone, IGF-1	Macroscopic evaluation, Semi-quantitative macroscopic evaluation, Histology, Immunohistochemistry, Semi-quantitative histological scoring, x-ray	√
Miller184	2014	Horse	-	16	-	Adult	-	Trochlea	Size: 15 mm / Depht: Full-thickness cartilage ± microfracture	1) KLD hydrogel (chondral), 2) Microfracture + KLD hydrogel, 3) Chondral defect, 4) Microfracture	16 weeks (19 weeks for empty defects)	KLD hydrogel		Macroscopic evaluation, Histology, Immunohistochemistry, Semi-quantitative histological scoring, Biomechanical tests, Biochemical assays, Clinical evaluation, X-ray, MRI,	X
Mimura185	2008	Rabbits	Japanese White	58	-	13 weeks	2.5 - 2.99 kg	Trochlea	Size: 5 mm / Depth: 5 mm	1) Type I collagen hydrogel, 2) 33% concentration gradient type I collagen hydrogel, 3) 50% concentration gradient type I collagen hydrogel	6 weeks	Type I collagen hydrogel		Histology, Immunohistochemistry, Semi-quantitative histological scoring	X
Mimura186	2011	Rabbits	Japanese White	51	-	13 weeks	2.5 - 2.99 kg	Trochlea	Size: 5 mm / Depth: 5 mm	1) 33% concentration gradient type I collagen hydrogel + osmotic pump with saline, 2) 33% concentration gradient type I collagen hydrogel + osmotic pump with 7 µg/mL BMP-2	3 and 6 months	Type I collagen hydrogel	BMP-2	Histology, Immunohistochemistry, Semi-quantitative histological scoring, PCR	X
Mohan187	2011	Rabbits	New Zealand White	18	M	6 months	-	Medial condyle	Size: 3.5 mm / Depth: 3 mm	1) PLGA microspheres, 2) PLGA microspheres (TGF-β1)-PLGA microspheres (BMP-2) scaffold, 3) PLGA microspheres (Hydroxyapatite)-PLGA microspheres scaffold, 4) PLGA microspheres (TGF-β1)-PLGA microspheres (BMP-2, hydroxyapatite) scaffold, 5) Empty defect	4 months	PLGA microsphere scaffold	TGF-β1, BMP-2	Macroscopic evaluation, Semi-quantitative macroscopic evaluation, Histology, Semi-quantitative histological scoring, MRI	√	X	Excluded from meta-analysis → Incorrect data
Mori188	2013	Rabbits	Japanese White	24	F	Adult	3.9 ± 0.5 kg	Trochlea	Size: 4.3 mm / Depth: 3 mm	1) Atellocollagen scaffold, 2) Atellocollagen scaffold + OP-1, 3) Empty defect	4 weeks	Atellocollagen scaffold	Osteogenic protein-BMP-7	Macroscopic evaluation, Semi-quantitative macroscopic evaluation, Histology, Immunohistochemistry, Semi-quantitative histological scoring, PCR	√
Mrosek189	2010	Rabbits	New Zealand White	10	-	Pilot: 3 months, Experiment: 8 months	-	Medial and lateral condyle	Pilot: Size: 3 mm / Depth: 6 mm; Experiment: Size: 5 mm / Depth: 6 mm	Pilot: 1) Tantalum, 2) Tantalum + periosteal graft + TGF-β1, 3) Empty defect; Experiment: 1) Tantalum/periosteum +TGF-β, 2) PCL/periosteum +TGF-β, 3) Empty defect	3 and 6 months	Tantalum and PCL	TGF-β1	Macroscopic evaluation, Histology, Semi-quantitative histological scoring	√		Assumption for meta-analysis → standard deviation empty defect control group set at 0.1 (orginal 0)
Muller190	2006	Rabbits	Chinchilla bastard	? (if unilateral surgery: 36; bilateral surgery: 18)	-	< 1 year	3 - 4 kg	Medial condyle	Size: 4 mm / Depth: 6 mm	1) PLA/polyglactin-polydioxanon fleece, 2) PLA/polyglactin-polydioxanon fleece + separating cement layer, 3) Empty defect	6 weeks, 3 and 6 months	PLA/polyglactin-polydioxanon fleece		Histology, Immunohistochemistry, Semi-quantitative histological scoring	√
Munirah191	2007	Sheeps	-	12	M	6 months	15 - 25 kg (avg: 20)	Medial and lateral condyle	Size: - / Depth: 2.5 mm	1) Fibrin hydrogel, 2) Fibrin hydrogel + chondrocytes, 3) ACI, 4) Empty defect	3 and 6 months	Fibrin hydrogel		Macroscopic evaluation, Semi-quantitative macroscopic evaluation, Histology, Semi-quantitative histological scoring	√	X	Excluded from meta-analysis → Results only provided as median, but no ranges are available. Therefore, estimation of standard deviation is impossible
Nagura192	2007	Rabbits	Japanese White	60	F	Adult	2.8 - 3.7 kg (avg 3.3)	Trochlea	Size: 5 mm / Depth: 5 mm	1) PLGA, 2) Empty defect	7 days	PLGA		Macroscopic evaluation, Histology, Immunohistochemistry, Semi-quantitative histological scoring	√
Necas193	2010	Minipigs	-	40	-	5 - 7 months	18 ± 4 kg	Medial and lateral condyle	Size: 6 mm / Depth: 12 mm	1) Type I collagen-chitosan scaffold, 2) Type I collagen-chitosan scaffold + MSCs, 3) Abrasive chondroplastics, 4) Forage, 5) Microfracture, 6) Mosaicplasty	6, 12 and 24 weeks	Type I collagen-chitosan scaffold		Macroscopic evaluation, Semi-quantitative macroscopic evaluation, Histology, Immunohistochemistry, Semi-quantitative histological scoring	√
Needham194	2014	Rats	Lewis	32	-	12 weeks	-	Trochela and femoral condyle	Size: 0.9 mm / Depth: 1.5 mm	1) OPF hydrogel/OPF hydrogel, 2) OPF hydrogel-bPei-HA-SOX trio complexes/OPF hydrogel, 3) OPF hydrogel/bPEI-HA-RUNX2 complexes, 4) OPF hydrogel-bPEI-HA-SOX trio complexes/OPF hydrogel-bPEI-HA-RUNX2 complexes	1, 2 and 8 weeks?	OPF hydrogel		Histology, Semi-quantitative histological scoring, Histomorphometry, µCT	X
Nettles195	2008	Goats	Nubian	8	M/F	-	36.29 - 58.97 kg	Medial condyle	Size: 6 mm / Depth: 4 mm	1) Elastin-like polypeptide hydrogel, 2) Empty defect	1, 2 and 6 months	Elastin-like polypeptide hydrogel		Macroscopic evaluation, Semi-quantitative macroscopic evaluation, Histology, Immunohistochemistry, Semi-quantitative histological scoring, MRI	√
Niederauer196	2000	Goats	Spanish	16	M	2 - 3 years	65.8 - 7.4 lb	Medial condyle and trochlea	Size: 2.8 mm / Depth: 4 mm	1) PLGA/PLGA, 2) 20% PLGA fibers-75:25 PLGA/10% PLGA fibers-75:25 PLGA, 3) 55:45 PLGA-20% bioglass/10% PLGA fibers-75:25 PLGA, 4) 75:25 PLGA-50% calcium sulfate/10% PLGA fibers-75:25 PLGA, 5-8) condition 1-4 + chondrocytes	2, 3, 4, 12 and 24 weeks	PLGA, 45S5 Bioglass R, Calcium sulfate, PLGA fibers (or combinations, see conditions)		Macroscopic evaluation, Semi-quantitative macroscopic evaluation, Histology, Immunohistochemistry, Semi-quantitative histological scoring, Biomechanical tests	X
Nixon197	1999	Horse	-	6	-	2 - 6 years	408.23 - 476.27 kg	Trochlea	Size: 15 mm / Depth: 4 mm	1) PLA/Fibrin, 2) PLA/Fibrin + IGF-1	4, 12 and 20 weeks	PLA/Fibrin	IGF-1	Macroscopic evaluation, Histology, Immunohistochemistry, Semi-quantitative histological scoring, Biochemical assays, OTHER STUFF	X
Noguchi198	1994	Rats	WKAH/Hkm	48	M	18 - 19 weeks		Trochlea	Size: 1.5 mm / Depth: 1.5 mm	1)Type I collagen hydrogel, 2) Type I collagen hydrogel + chondrocytes (isograft), 3) Type I collagen hydrogel + chondrocytes (allograft)	4 and 12 weeks	Type I collagen hydrogel		Macroscopic evaluation, Histology, Semi-quantitative histological scoring	X
Ogawa199	2012	Rabbits	Japanese White	35	F	6 months	3.5 ± 0.6 kg	Trochlea	Size: 4.3 mm / Depth: 7 mm	1) PAMPS hydrogel, 2) PDMAAm hydrogel, 3) PAMPS/PDMAAm DN hydrogel, 4) Empty defect	4, 8, 16 and 24 weeks	PAMPS hydrogel, PDMAAm hydrogel, PAMPS-PDMAAm DN hydrogel		Macroscopic evaluation, Semi-quantitative macroscopic evaluation, Histology, Immunohistochemistry, Semi-quantitative histological scoring, PCR	√
Oliveira200	2010	Rabbits	New Zealand White	12	F	10 - 11 weeks	2.4 - 2.6 kg	Medial condyle	Size: 4 mm / Depth: Full-thickness cartilage defect + 1 mm subchondral bone	1) Gellan gum hydrogel, 2) Gellan gum hydrogel + ASCs, 3) Gellan gum hydrogel + predifferentiated ASCs, 4) Gellan gum hydrogel + chondrocytes, 5) Empty defect	12 weeks	Gellan gum hydrogel	TGF-β1, BMP-2	Macroscopic evaluation, Histology, Semi-quantitative histological scoring, PCR	√	X	Excluded from meta-analysis → Incorrect data
Oshima201	2009	Rabbits	New Zealand White	52	F	9 - 15 months	3.5 - 4.5 kg	Medial condyle	Size: 3.7 mm / Depth: 3 mm	1) PLA, 2) PLA + MSCs, 3) Empty defect	2 - 3, 6 and 12 - 44 weeks	PLA		Macroscopic evaluation, Histology, Immunohistochemistry	X
Oshima202	2005	Rats	-	32	F	12 weeks	-	Medial condyle	Size: 1.5 mm / Depth: 3 mm	1) Fibrin glue, 2) Fibrin glue + MSCs	6 months	Fibrin glue		Macroscopic evaluation, Histology	X
Paletta203	1992	Dogs	Mongrel	20	-	Adult	25 - 30 kg	Trochlea	Size: 4 mm / Depth: 4 mm	1) Fibrin, 2) Empty defect	4 and 16 weeks	Fibrin		Macroscopic evaluation, Histology	X
Pei204	2009	Rabbits	New Zealand White	18	M	8 months	3.5 - 4 kg	Medial condyle	Size: 4 mm / Depth: 5 mm	1) Fibrin glue-saturated Collagraft/PGA-fibrin, 2) Fibrin glue-saturated Collagraft/PGA-fibrin + SDMSCs, 3) Empty defect	4 and 12 weeks	Fibrin glue-saturated Collagraft®/PGA-fibrin		Macroscopic evaluation, Histology, Immunohistochemistry, Semi-quantitative histological scoring, X-ray	√
Perka205	2000	Rabbits	New Zealand White	24	-	6 months	-	Trochlea	Size: 4 mm / Depth: Osteochondral	1) PGLA/polydioxanone, 2) PGLA/polydioxanone + chondrocytes, 3) Empty defect	6 and 12 weeks	PGLA/polydioxanone		Macroscopic evaluation, Histology, Semi-quantitative histological scoring	√	X	Excluded from meta-analysis → No standard deviations available
Perka206	2000	Rabbits	New Zealand White	28	M	Adult	-	Trochlea	Size: 3 mm / Depth: 2.5 mm	1) Fibrin hydrogel, 2) Fibrin hydrogel + periosteal cells, 3) Fibrin hydrogel + TGF-β1 + periosteal cells, 4) Empty defect	1, 3 and 6 weeks	Fibrin hydrogel	TGF-β1	Macroscopic evaluation, Histology, Semi-quantitative histological scoring, Histomorphometry, TEM	√
Pilliar207	2007	Sheeps	-	12 (Experiment 1: 9, Experiment 2: 3)	-	6 - 9 months	-	Trochlea and femoral condyle?	Size: - mm / Depth: - mm (Implant length: 6 mm, diameter: 4 mm)	1) Calcium polyphosphate, 2) Calcium polyphosphate + chondrocytes	4, 8 and 12 weeks	Calcium polyphosphate		Histology, Biomechanical tests, X-ray	X
Ponticiello208	2000	Rabbits	New Zealand White	-	-	Adult	2 - 3 kg	Medial condyle	Size: 2.8 mm / Depth: 3 mm	1) Gelatin scaffold	8, 12 and 30 weeks	Gelatin scaffold		Histology	X
Qi209	2010	Rabbits	New Zealand White	42	M/F	6 weeks	2.5 kg	Lateral condyle	Size: 3 mm / Depth: 3 mm	1) Demineralized bone matrix/Fibrin glue, 2) Demineralized bone matrix/Fibrin glue + chondrocytes, 3) Empty defect	2, 4, 8 and 42 weeks (acellular 8 weeks)	Demineralized bone matrix/Fibrin glue		Macroscopic evaluation, Histology, Semi-quantitative histological scoring	√		Article in Chinese, excluded for methodological quality assessment
Qi210	2014	Rabbits	New Zealand White	18	M	-	2.5 - 3 kg	Trochlea	Size: 4 mm / Depth: 3 mm	1) PLGA, 2) PLGA + MSCs, 3) PLGA + MSCs, encapsulated with MSCs sheet	2, 4, 12 and 24 weeks	PLGA		Macroscopic evaluation, Histology, Semi-quantitative histological scoring, Histomorphometry	X
Qiu211	2002	Rabbits	New Zealand White	25	F	Adult	-	Medial and lateral condyle	Size: 3 mm / Depth: 3 mm	1) Gateshead rod, 2) Empty defect	12 weeks	Gateshead rod (tightly bound carbon fibres core with woven carbon fibres surrounding sheath)		Macroscopic evaluation, Histology, Biomechanical tests, SEM, x-ray	X
Ravanetti212	2015	Rabbits	New Zealand White	7	M	-	4.2 ± 0.2 kg	Medial condyle and trochlea	Size: 2.7 mm / Depth: 5 mm	1) Chitosan, 2) Empty defect	2, 4, 12 and 24 weeks	Chitosan		Macroscopic evaluation, Semi-quantitative macroscopic evaluation, Histology, Semi-quantitative histological scoring	√
Re'em213	2012	Rabbits	New Zealand White	-	F	8 months	4.5 kg	Trochlea	Size: 3 mm / Depth: 3 mm	1) Alginate hydrogel + BMP-4/Alginate hydrogel + TGF-β1, 2) Empty defect	6 and 12 weeks	Alginate hydrogel		Macroscopic evaluation, Histology, Immunohistochemistry, uCT	X
Reyes214	2012	Rabbits	New Zealand	70	M	6 months	3 - 4 kg	Intercondylar fossa	Size: 4.5 mm/ Depth: 4 mm	1) PLGA/Alginate scaffold, 2) PLGA/Alginate scaffold + BMP-2 (2.5 µg)-loaded microspheres, 3) PLGA/Alginate scaffold + BMP-2 (5 µg)-loaded microspheres, 4) PLGA/Alginate scaffold + TGF-β1 (50 ng)-loaded microspheres, 5) Empty defect	12 weeks	PLGA/Alginate scaffold-PVA microspheres	BMP-2, TGF-β1	Histology, Immunohistochemistry, Semi-quantitative histological scoring	√
Reyes215	2014	Rabbits	New Zealand	60	M	Adult	-	Intercondylar fossa	Size: 4.5 mm / Depth: 4 mm	1) PLGA/SPU-PLGA microspheres, 2) PLGA/SPU + BMP-2 (2.5 µg)-loaded PLGA microspheres, 3) PLGA/SPU + BMP-2 (5 µg)-loaded PLGA microspheres, 4) PLGA/SPU + TGF-β1 (50 ng)-loaded PLGA microspheres, 5) Empty defect	4, 8 and 12 weeks	PLGA/SPU-PLGA microspheres	BMP-2, TGF-β1	Immunohistochemistry, Semi-quantitative histological scoring	√
Reyes216	2013	Rabbits	New Zealand	42	M	6 months	3 - 4 kg	Intercondylar fossa	Size: 4.5 mm / Depth: 4 mm	1) Scaffold, 2) Sc. + BMP-2-loaded microspheres (middle layer), 3) Scaffold + MSCs, 4) Scaffold + chondrocytes, 5) Sc. + BMP-2-loaded microspheres (middle layer) + MSCs, 6) Sc. + BMP-2-loaded microspheres (middle layer) + chondrocytes, 7) Empty defect	6 weeks	PLGA/Alginate hydrogel-PLGA microspheres/Alginate hydrogel-PLGA microspheres	BMP-2	Histology, Immunohistochemistry, Semi-quantitative histological scoring	√
Rudert217	2005	Rabbits	New Zealand White	33	F	5 - 6 months	3.5 - 5.5 kg	Trochlea and medial and lateral condyle	Size: 4 mm / Depth: 3 mm	1) Lyophilized dura, 2) Lyophilized dura + chondrocytes, 3) Ethisorb, 4) Ethisorb + chondrocytes, 5) PLLA, 6) PLLA + chondrocytes, 7) Empty defect	12 weeks	Dura (mainly collagen type I), PLLA, Ethisorb (polydioxanon/polyglactin polymer) 210		Macroscopic evaluation, Semi-quantitative macroscopic evaluation, Histology, Immunohistochemistry, Semi-quantitative histological scoring, SEM	√	X	Excluded from meta-analysis → No means and standard deviations available
Saha218	2013	Rats	Wistar	? (if unilateral surgery: 20; bilateral surgery: 10)	M	-	230 - 250 g	Trochlea	Size: 1.8 mm / Depth: 1 mm	1) Mulberry silk (-/-/-), 2) Mulberry silk (BMP-2/BMP-2/TGF-β), 3) Non-Mulberry silk (-/-/-), 4) Non-Mulberry silk (BMP-2/BMP-2/TGF-β), 5) Empty defect	12 weeks	Silk (mulberry and non-mulberry, with different layers containing growth factors)	TGF-β3, BMP-2	Macroscopic evaluation, Immunohistochemistry	X
Sakata219	2014	Rabbits	Japanese White	36	F	15 - 18 weeks (avg: 16.3)	2.7 - 3.6 kg (avg: 3.1)	Trochlea	Size: 5 mm / Depth: 5 mm	1) PLGA, 2) Empty defect	1 and 4 months	PLGA		Macroscopic evaluation, Histology, Immunohistochemistry, Semi-quantitative histological scoring	√
Sakata220	2012	Rabbits	Japanese White	48	F	15 - 18 weeks (avg: 16.3)	2.7 - 3.6 kg (avg: 3.1)	Trochlea	Size: 5 mm / Depth: 5 mm	1) PLGA, 2) Empty defect	3 and 6 months	PLGA		Macroscopic evaluation, Histology, Immunohistochemistry, PCR	X
Schaefer*221	2002	Rabbits	New Zealand White	24	F	8 months	3.5 - 3.9 kg	Trochlea	Size: 7 x 5 mm / Depth: 5 mm	1) Collagraft/PGA, 2) Collagraf/PGA + chondrocytes, 3) Collagraft + bone marrow/PGA + chondrocytes, 4) Empty defect	6, 9 and 12 weeks	Collagraft (type I collagen, hydroxyapatite, TCP)/PGA		Macroscopic evaluation, Histology, Immunohistochemistry, Semi-quantitative histological scoring, Biochemical assays, Biomechanical tests	√
Schagemann222	2009	Sheeps	Merino	12	-	4 - 6 years	75 - 85 kg	Medial condyle	Size: 6 mm / Depth: 12 mm	1) Alginate-gelatin hydrogel, 2) Alginate-gelatin hydrogel + chondrocytes, 3) Alginate-gelatin hydrogel + periosteal cells, 4) Empty defect	1, 3, 6 and 9 weeks	Alginate-gelatin hydrogel		Macroscopic evaluation, Histology, Immunohistochemistry, Semi-quantitative histological scoring	√
Schleicher223	2013	Sheeps	Merino	12	F	2 years	41.8 ± 3.6 kg	Medial and lateral condyle	Size: 9.4 mm / Depth: 11 mm	1) Hydroxyapatite-collagen/Type type I-III collagen scaffold, 2) Hydroxyapatite-collagen/Type type I-III collagen scaffold + chondrocytes, 3) Allogenous bone/Type type I-III collagen scaffold + chondrocytes	6 and 12 weeks	Hydroxyapatite-collagen/Type type I-III collagen scaffold, Allogenous bone/Type type I-III collagen scaffold		Macroscopic evaluation, Semi-quantitative macroscopic evaluation, Histology, Immunohistochemistry, Histomorphometry, PCR	X
Schlichting224	2008	Sheeps	Merino	24	F	2 - 3 years	77 ± 8 kg	Medial and lateral condyle	Size: 7.3 mm / Depth: 10 mm	1) Soft PLGA-calcium sulfate scaffold, 2) Stiff PLGA-calcium sulfate scaffold, 3) Empty defect	3 and 6 months	PLGA-calcium sulfate		Macroscopic evaluation, Histology, Immunohistochemistry, Biomechanical tests, Histomorphometry	X
Seo225	2013	Horse	Thoroughbred	6	F	5 ± 3.4 years	433.2 ± 92.3 kg	Trochlea (talus)	Size: 4.5 mm / Depth: 10 mm	1) β-TCP/Gelatin scaffold, 2) β-TCP/Gelatin scaffold + MSCs + BMP-2/β-TCP/Gelatin scaffold + chondrocytes + MSC + PRP	8, 16, 24 and 48 weeks	β-TCP/Gelatin scaffold	PRP, BMP-2	Macroscopic evaluation, Semi-quantitative macroscopic evaluation, Histology, Immunohistochemistry, Semi-quantitative histological scoring, µCT, X-ray	X
Seol226	2013	Rats	Sprague-Dawley	9	-	6 months	-	Trochlea	Size: 0.75 mm / Depth: 2 - 3 mm	1) Pluronic F-127-sodium hyaluronate hydrogel, 2) Pluronic F-127-sodium hyaluronate hydrogel + MSCs, 3) Empty defect	Experiment 1: 1, 2, 3 and 4 weeks. Experiment 2: 4 weeks	Pluronic F-127-sodium hyaluronate hydrogel		Histology	X
Shahgaldi227	1998	Rabbits	New Zealand White	24	-	Adult	2.8 - 3 kg	Trochlea	Size: 4 mm / Depth: 4 mm	1) Porite type coral, 2) Empty defect	2, 4, 6, 8, 10 and 12 weeks	Porite type coral		Macroscopic evaluation, Histology, SEM	X
Shao228	2006	Rabbits	New Zealand White	21	-	5 - 6 months	3 - 3.5 kg	Medial condyle	Size: 4 mm / Depth: 5.5 mm	1) PCL-TCP-fibrin glue/PCL-fibrin glue, 2) PCL-TCP-fibrin glue + MSCs/PCL-fibrin glue + MSCs	2, 4, 6, 8, 10 and 12 weeks	PCL-TCP-fibrin glue/PCL-fibrin glue		Macroscopic evaluation, Histology, Immunohistochemistry, Semi-quantitative histological scoring, Biomechanical tests	X
Shao229	2006	Rabbits	New Zealand White	12	-	- (closed epiphyses)	3 - 3.5 kg	Medial condyle	Size: 4 mm / Depth: 5 mm	1) PCL/Fibrin glue, 2) PCL + MSCs/Fibrin glue + MSCs	1, 3 and 6 months	PCL/Fibrin glue		Macroscopic evaluation, Histology, Immunohistochemistry, µCT	X
Shao230	2012	Rats	-	20	-	-	200 gram	Trochlea	Size: 2 mm / Depth: 2 mm	1) PCL, 2) PCL-E7, 3) PCL-RGD	8 weeks	PCL	E7, RGD	Histology, Immunohistochemistry	X
Shi231	2012	Rabbits	Japanese White	27	M	3 - 4 months	3 - 3.5 kg	Trochlea	Size: 4.5 mm / Depth: Full-thickness cartilage defect (0.8 mm) + microfracture (Size: 25G needle / Depth: - mm, - penetrations/defect)	1) PLGA (no microfracture), 2) PLGA, 3) Empty defect	4 weeks	PLGA		Macroscopic evaluation, Semi-quantitative macroscopic evaluation, Histology, Immunohistochemistry, Semi-quantitative histological scoring, MRI	X
Shim232	2008	Rabbits	New Zealand White	20	-	-	3 kg	Trochlea	Size: 5 mm / Depth: Full-thickness cartilage defect + microfracture (Size: 0.7 mm / Depth: 5 mm, 6 - 7 penetrations/defect)	1) PLGA-β-TCP + dehydroepiandrosterone sulfate, 2) Empty defect	4, 6, 8, 12 and 24 weeks	PLGA-β-TCP	Dedyroepiandrosterone, sulfated Dedyroepiandrosterone	Macroscopic evaluation, Histology	X
Shimomura233	2014	Rabbits	New Zealand White	41	-	Adult	-	Trochlea	Size: 5 mm / Depth: 6 mm	1) Hydroxyapatite, 2) Hydroxyapatite/in vitro tissue-engineered construct by SDMSCs, 3) Normal knees	4, 8 and 12 weeks	Hydroxyapatite ± in vitro tissue-engineered construct		Macroscopic evaluation, Histology, Semi-quantitative histological scoring, Biomechanical tests	X
Solchaga234	2002	Rabbits	New Zealand White	33	-	4 months	2.6 - 3 kg	Medial condyle	Size: 3 mm / Depth: 3 mm	1) Fibronectin-coated hyaluronan-based hydrogel, 2) Fibronectin-coated hyaluronan-based hydrogel + bone marrow, 3) Empty defect (previous experiment)	6 and 12 weeks	Fibronectin-coated hyaluronan-based hydrogel (ACP™)		Macroscopic evaluation, Histology, Immunohistochemistry, Semi-quantitative histological scoring	√
Solchaga235	2005	Rabbits	New Zealand White	54	-	4 months	2.6 - 3 kg	Medial condyle	Size: 3 mm / Depth: 1.5 mm	1) ACP, 2) HYAFF-11, 3) PLGA, 4) PLLA	16 weeks	Hyaluronan-based hydrogel (ACP™), Hyaluronan-based hydrogel (HYAFF-11®), PLGA, PLLA (all fibronectin-coated)		Macroscopic evaluation,Histology, Immunohistochemistry, Histomorphometry	X
Solchaga236	2000	Rabbits	New Zealand White	36	-	4 months	2.6 - 3 kg	Medial condyle	Size: 3 mm / Depth: 3 mm	1) ACP, 2) HYAFF-11, 3) Empty defect	8 weeks	Hyaluronan-based hydrogel (ACP™), Hyaluronan-based hydrogel (HYAFF-11®)		Histology, Semi-quantitative histological scoring	√
Song237	2006	Rabbits	New Zealand White	80	M/F	5 months	1.55 kg	Trochlea	Size: 3 mm / Depth: 5 mm	1) Type I collagen scaffold, 2) Type I collagen scaffold + chondrocytes, 3) Type I collagen scaffold + chondrocytes (IGF-1 transfected), 4) Autologous cartilage, 5) Empty defect	16 and 32 weeks	Type I collagen scaffold		Histology, Semi-quantitative histological scoring	√		Article in Chinese, excluded for methodological quality assessment
Sosio238	2015	Pigs	Large White	6	-	4 months	70 kg	Trochlea	Size: 8 mm / Depth: 9 mm	1) Hydroxyapatite/Type I collagen scaffold, 2) Hydroxyapatite/Type I collagen scaffold + chondrocytes, 3) Empty defect	6, 12 and 24 weeks	Hydroxyapatite/Type I collagen scaffold		Macroscopic evaluation, Semi-quantitative macroscopic evaluation, Histology, Immunohistochemistry, Semi-quantitative histological scoring, Biomechanical tests, Biochemical assay	√	X	Excluded from meta-analysis → Missing data
Sotoudeh239	2013	Rabbits	New Zealand White	10	-	Adult	2.7 - 3.5 kg	Trochlea	Size: 4 mm / Depth: 3 mm	1) Hydroxyapatite-zirconia stabilized yttria, 2) Empty defect	12 weeks	Hydroxyapatite-zirconia stabilized yttria		Macroscopic evaluation, Histology, Immunohistochemistry, Semi-quantitative histological scoring	√
Speer240	1979	Rabbits	New Zealand White	32	-	10 - 12 months	-	Trochlea	Size: 6 mm / Depth: 5 - 6 mm	1) Type I collagen scaffold, 2) PVA scaffold, 3) Empty defect	26 weeks	Type I collagen scaffold, PVA scaffold		Macroscopic evaluation, Histology	X
Streitparth241	2009	Sheeps	-	12	-	30 months (avg)	77 ± 8 kg	Medial and lateral condyle	Experiment: Size: 7.3 mm / Depth: 10 mm; Control: Size: 8.3 mm / Depth: 10 mm	1) PLGA (stiffness 87%), 2) PLGA (stiffness 55%), 3) Empty defect	2, 12 and 24 weeks	PLGA		Histology, Semi-quantitative histological scoring, MRI, Semi-quantitative MRI scoring	√
Sukegawa242	2012	Rabbits	Japanese White	20	F	15 weeks	2.6 - 2.9 kg	Trochlea	Size: 4.5 mm / Depth: 3 mm	1) Alginate hydrogel + BSA, 2) Alginate hydrogel + SDF-1, 3) Alginate hydrogel + AMD3100, 4) Empty defect	6 and 12 months	Alginate hydrogel	SDF-1, AMD3100	Macroscopic evaluation, Semi-quantitative macroscopic evaluation, Histology, Immunohistochemistry, Semi-quantitative histological scoring, Biomechanical tests, Western Blot, Cell homing assessment	√
Sun243	2010	Rabbits	New Zealand	24	-	-	2.8 - 3.2 kg	Trochlea	Size: 5 mm / Depth: 4 mm	1) PLGA, 2) PLGA-PRP, 3) Empty defect	6 and 12 weeks	PLGA	PRP	Macroscopic evaluation, Histology, Immunohistochemistry, Semi-quantitative histological scoring, µCT	√
Suominen244	1996	Rabbits	New Zealand	18	-	6 months	2.9 - 4.2 kg	Trochlea	Size: 4 mm / Depth: - (Implant height: 4 mm)	1) Bioglass-7, 2) Bioglass-11, 3) Bioglass-14, 4) Hydroxyapatite, 5) Hydroxyapatite-bioglass, 6) Empty defect	12 weeks	Bioactive glass, Hydroxyapatite, Hydroxyapatite-bioglass		Macroscopic evaluation,Histology, X-ray, SEM, EDXA	X
Tamai245	2005	Rabbits	New Zealand White	52	-	4 - 6 months	2.5 - 3 kg	Trochlea	Size: 4 mm / Depth: 6 mm	1) Hydroxyapatite, 2) Hydroxyapatite-PLA-PEG scaffold, 3) Hydroxyapatite-PLA-PEG scaffold + BMP-2, 4) Empty defect	4 and 12 weeks	Hydroxyapatite-PLA-PEG scaffold	BMP-2	Histology, Immunohistochemistry, Semi-quantitative histological scoring, X-ray	√
Tan246	2011	Rabbits	New Zealand White	27	M/F	-	2.5 kg	Intercondylar fossa	Size: 4 mm / Depth: Osteochondral defect	1) Bone/cartilage scaffold, 2) Bone/cartilage scaffold + MSCs-chondrocytes, 3) Empty defect	16 weeks	Bone/cartilage scaffold		Macroscopic evaluation, Histology, Semi-quantitative histological scoring	√	X	Excluded from meta-analysis → No standard deviations available
Tanaka247	2005	Rabbits	New Zealand White	18	-	-	3 - 3.3 kg	Intercondylar fossa	Size: 4.2 mm / Depth: 6 mm	1) β-TCP, 2) β-TCP + chondrocytes	12 weeks	β-TCP		Macroscopic evaluation, Histology, Immunohistochemistry, Semi-quantitative histological scoring	X
Tatebe248	2005	Rabbits	Japanese White	16	-	6 months	2 - 3 kg	Trochlea	Size: 10 x 5 mm / Depth: 2 mm	1) PGA/Seprafilm, 2) PGA/Seprafilm + MSCs, 3) Empty defect	4, 8 and 12 weeks	PGA/sodium hyaluronate and carboxymethylcellulose sheet (Seprafilm)		Macroscopic evaluation, Semi-quantitative macroscopic evaluation, Histology, Immunohistochemistry, Semi-quantitative histological scoring, Histomorphometry	√	X	Excluded from meta-analysis → 1) N = 1 empty defect, 2) standard deviation experimental group = 0, for use should be changed to e.g. 0.1
Toyokawa249	2010	Rabbits	Japanese White	72	F	Adult	2.7 - 3.6 kg (avg: 3.1 )	Trochlea	Size: 5 mm / Depth: 5 mm	1) Solid cylindrical PLGA scaffold, 2) Cannulated tubular PLGA scaffold, 3) Empty defect	6 weeks	PLGA		Macroscopic evaluation, Histology, Immunohistochemistry, Semi-quantitative histological scoring	√
von Schroeder250	1991	Rabbits	New Zealand White	18	M	Mature	2.5 - 3.2 kg	Medial condyle	Size: 3.7 mm / Depth: 5 mm	1) PLA, 2) PLA + periosteum	3 and 6 months	PLA		Macroscopic evaluation, Histology, Semi-quantitative histological scoring, Biochemical assays, Biomedical tests	X
Wakitani251	1994	Rabbits	New Zealand White	86	-	4 months	2.5 kg (avg)	Medial condyle	Size: 6 x 3 mm / Depth: 3 mm	1) Collagen hydrogel, 2) Collagen hydrogel + MSCs, 3) Collagen hydrogel + periostium-derived MSCs, 4) Empty defect	3 months	Type I collagen hydrogel		Macroscopic evaluation, Histology, Semi-quantitative histological scoring, Biomechanical tests	√	X	Excluded from meta-analysis → No standard deviations available
Wang252	2006	Rabbits	Japanese	30	M/F	5 months	2 - 2.5 kg	Trochlea	Size: 4.5 mm / Depth: 5 mm	1) Type I collagen hydrogel, 2) Type I collagen hydrogel + MSCs + dexamethasone inducing, 3) Type I collagen hydrogel + MSCs + dexamethasone + TGF-β1	1, 3, 4, 5, 6 and 8 weeks	Type I collagen hydrogel	Dexamethason, TGF-β (both only in vitro cultured with the cells)	Histology, Semi-quantitative histological scoring	X
Wang253	2010	Rabbits	New Zealand White	21	-	3 months	2 - 2.5 kg	Trochlea	Size: 4 mm / Depth: 4 mm	1) PLGA-fibrin hydrogel-(TMC-pDNA-TGF-β1 complexes), 2) PLGA-fibrin hydrogel + MSCs, 3) PLGA-fibrin hydrogel-(TMC-pDNA-TGF-β1 complexes) + MSCs	1 and 2 months	PLGA-fibrin hydrogel	TGF-β1	Macroscopic evaluation, Histology, Immunohistochemistry, Semi-quantitative histological scoring, PCR	X
Wang254	2007	Rabbits	-	30	M/F	3 - 4 months	2 - 3 kg	Lateral condyle	Size: 3 mm / Depth: 3 mm	1) PLA, 2) PLA + bone marrow monocytes, 3) Empty defect	13 and 26 weeks	PLA		Macroscopic evaluation, Histology, Semi-quantitative histological scoring	√		Article in Chinese, excluded for methodological quality assessment
Wang255	2014	Rabbits	New Zealand White	48	-	4 months	2.5 kg ± 0.1 kg	Trochlea	Size: 6 mm / Depth: 8 mm	1) Saline injection, 2) Subchondral drilling, 3) Hyaluronic acid-coated CDMP-1 injection, 4) Subchondral drilling + Hyaluronic acid-coated CDMP-1	6, 12 and 24 weeks	Hyaluronic acid	CDMP-1	Macroscopic evaluation, Histology, Histomorphometry, PCR	X
Wang256	2014	Rabbits	New Zealand White	24	-	3 months	2 - 2.5 kg	Trochlea	Size: 4 mm / Depth: 4 mm	1) Atellocollagen hydrogel, 2) Atellocollagen hydrogel + polyacrylic acid-resveratrol, 3) Empty defect	12 weeks	Atellocollagen hydrogel		Macroscopic evaluation, Histology, Immunohistochemistry, PCR	X
Wang257	2014	Pigs	Diannan-small-ear	12	-	8 months	12 kg	Medial and lateral condyle	Size: 7 mm / Depth: 4 mm	1) Demineralized bone matrix, 2) Demineralized bone matrix + MSCs, 3) Demineralized bone matrix + Ad - BMP-2 and Ad-TGF-β3-infected MSCs, 4) Empty defect	1, 2 and 3 months	Demineralized bone matrix	BMP-2 and Ad-TGF-β3-infected MSCs	Macroscopic evaluation, Histology, Semi-quantitative histological scoring	√
Wayne258	2005	Dogs	Mixed breed	10	-	Adult	~ 25 kg	Medial and lateral condyle	Size: 6 mm / Depth: 4 mm	1) PLA-alginate amalgam, 2) PLA-alginate amalgam + MSCs	24 weeks	PLA-alginate amalgam		Macroscopic evaluation, Semi-quantitative macroscopic evaluation, Histology, Immunohistochemistry, Semi-quantitative histological scoring, Biomechanical tests, SEM	X
Wegener259	2010	Sheeps	Merino	9	-	Adult	< 60 kg	Medial condyle	Size: 8 mm / Depth: Full-thickness cartilage defect + microfracture (PLA anchor; Size: 1 mm, Depth: 4 mm, 4 penetrations/defect)	1) PLA/PGA, 2) PLA/PGA-fibrin glue + bone marrow cells, 3) Empty defects	4 and 8 weeks	PLA/PGA ± fibrin glue		Macroscopic evaluation, Histology, Immunohistochemistry, Semi-quantitative histological scoring	√
Wegener260	2009	Sheeps	Merino	12	-	> 18 months	> 60 kg	Medial condyle	Size: 8 mm / Depth: Full-thickness cartilage defect + microfracture (Size: 1 mm / Depth: 4 mm, 4 penetrations/defect)	1) PLGA, 2) Microfracture + PLGA, 3) Chondral defect, 4) Chondral defect + microfracture	3 and 6 months	PLGA		Macroscopic evaluation, Histology, Immunohistochemistry, Semi-quantitative histological scoring	√
Wei261	2015	Rabbits	New Zealand White	17	F	4 - 6 months	3.5 - 4 kg	Trochlea	Size: 6 x 6 mm / Depth: 3 mm	1) PCL-hydroxyapatite, 2) Autologous osteochondral transplantation, 3) Microfracture, 4) Empty defect	4, 16 and 24 weeks	PCL-hydroxyapatite		Macroscopic evaluation, Histology	X
Wu262	2008	Rabbits	New Zealand	18	M/F	6 months	-	Trochlea	Size: 4 mm / Depth: 4 mm	1) Hydroxyapatite/Polyamide 66, 2) Hydroxyapatite/Polyamide 66 + MSCs, 3) Empty defect	1, 4, 12 and 24 weeks	Hydroxyapatite/Polyamide 66		Macroscopic evaluation, Histology, Immunohistochemistry	X
Xie263	2010	Rabbits	New Zealand White	18	-	5 - 6 months	3 kg	Medial condyle	Size: 4.5 mm / Depth: 5 mm	1) PCLC, 2) PCLC + MSCs, 3) Empty defect	8 and 16 weeks	PLCL		Macroscopic evaluation, Histology, Immunohistochemistry, Semi-quantitative histological scoring, Biochemical assays	√
Xie264	2012	Rabbits	New Zealand White	42	M	Adult	2.5 - 3 kg	Trochlea	Size: 4 mm / Depth: 3 mm	1) PRP hydrogel, 2) PRP hydrogel + ASCs, 3) PRP hydrogel + MSCs, 4) Empty defect	6 and 12 weeks	PRP hydrogel		Macroscopic evaluation, Semi-quantitative macroscopic evaluation, Histology, Immunohistochemistry, Semi-quantitative histological scoring, PCR, Western blot, µCT	√
Yagihashi265	2009	Rabbits	-	33	F	13 weeks	2.5 - 3 kg	Trochlea	Size: 5 mm / Depth: 10 mm	1) 50 mg demineralized dentin matrix, 2) 100 mg demineralized dentin matrix, 3) Empty defect	6 weeks and 3 months	Demineralized dentin matrix		Macroscopic evaluation, Histology, Semi-quantitative histological scoring, µCT	√	X	Excluded from meta-analysis → Group size unknown
Yan266	2007	Rabbits	New Zealand White	36	-	Adult	2.5 - 3.5 kg	Trochlea	Size: 4.5 mm / Depth: 3 mm	1) PLA, 2) PLA + chondrocytes, 3) PLA + MSCs, 4) PLA + fibroblasts, 5) PLA + umbilical cord blood stem cells	8 and 12 weeks	PLA		Macroscopic evaluation, Histology, Immunohistochemistry, Semi-quantitative histological scoring	X
Yan267	2015	Rabbits	New Zealand White	12	M	9 - 11 weeks	2.4 kg (avg)	Intercondylar fossa and trochlea	Size: 4.5 mm / Depth: 5 mm	1) Silk-nano calcium phosphate/Silk fibroin, 2) Empty defect	6 and 12 weeks	Silk-nano calcium phosphate/Silk fibroin		Macroscopic evaluation, Histology, Immunohistochemistry, µCT	X
Yang268	2011	Dogs	-	12	M	2 years	20 - 25 kg	Medial and lateral condyle	Size: 4.2 mm / Depth: 6 mm	1) DCBM/DCM, 2) DCBM/DCM + MSCs	6 and 12 weeks	DCBM/DCM		Macroscopic evaluation, Semi-quantitative macroscopic evaluation, Histology, Immunohistochemistry, Semi-quantitative histological scoring, Biochemical assays, Biomechanical tests, µCT	X
Yang269	2009	Rabbits	New Zealand	36	M/F	-	-	Trochlea	Size: ? mm / Depth: ? Mm	1) Cancellous bone scaffold, 2) Cancellous bone scaffold + ASCs (in vitro stimulated with cartilage-derived morphogenetic protein growth factor 1)	7 days and 2 months	Cancellous bone scaffold	Cartilage-derived morphogenetic protein growth factor 1	Histology	X
Yasuda270	2009	Rabbits	Japanese White	90	F	Adult	3.3 ± 0.3 kg	Trochlea	Experiment 1: Size: 4.3 mm / Depth: 15 mm; Experiment 2: Size 4.3 mm / Depth: 1.5 - 2.4 mm, 2.5 - 3.4 mm or > 3.5 mm (3 different vacant defect dephts after surgery)	Exp 1: 1) PAMPS-PDMAAm DN hydrogel, 2) Empty defect. Exp 2: 1) PAMPS-PDMAAm DN hydrogel, 2) PVA gel, 3) UHMWPE, 4) Empty defect (all conditions 1.5, 2.5 or 2.5 mm deep)	6 and 12 months	PAMPS-PDMAAm DN hydrogel, PVA hydrogel, UHMWPE		Macroscopic evaluation, Semi-quantitative macroscopic evaluation, Histology, Immunohistochemistry, Semi-quantitative histological scoring, PCR	√
Ye271	2003	Rabbits	New Zealand	28	M	Adult	2.29 ± 0.25 kg	Trochlea	Size: 5 mm / Depth: 3 mm	1) Type II collagen scaffold, 2) Empty defect	180 days	Type II collagen scaffold		?	X
Ye272	2005	Rabbits	Purebred New Zealand	24	M	Adult	2.29 ± 0.25 kg	Trochlea	Size: 5 mm / Depth: 3 mm	1) Type II collagen scaffold, 2) Empty defect	4 and 12 weeks	Type II collagen scaffold		Macroscopic evaluation, Histology	X
Yin273	2005	Rabbits	New Zealand White	32	M/F	4 months	2 - 3 kg	Medial condyle	Size: 3 mm / Depth: 3 mm	1) Cancellous bone/Cortical bone matrix, 2) Cancellous bone/Cortical bone matrix + MSCs, 3) Empty defect	52 weeks	Cancellous bone/Cortical bone matrix		Macroscopic evaluation, Histology, Immunohistochemistry, Semi-quantitative histological scoring	√		Article in Chinese, excluded for methodological quality assessment
Ylanen274	1999	Rabbits	Elco	8	F	4 - 5 months	4.05 ± 0.66 kg	Trochlea	Size: 4 mm / Depth: 6 - 7 mm	1) Bioactive glass, 2) Composite glass, 3) Empty defect	6 weeks	Bioglass		Macroscopic evaluation, Histology, Semi-quantitative histological scoring, Biomechanical tests, SEM	√
Yokota275	2011	Rabbits	New Zealand White	25	F	Adult	3.6 - 0.4 kg	Medial condyle	Experiment 1: Size: 2.4 mm / Depth: 1.5, 2.5, 3.5 mm; Experiment 2: Size: 2.4 mm / Depth: 2.5 mm	Exp 1: 1) PAMPS-PDMAAm DN hydrogel (1.5 mm), 2) PAMPS-PDMAAm DN hydrogel (2.5 mm), 3) PAMPS-PDMAAm DN hydrogel (3.5 mm), 4) Empty defect. Exp 2: 1) PAMPS/PDMAAm DN hydrogel (2.5 mm vacant space), 2) Empty defect	2 and 4 weeks	PAMPS-PDMAAm DN hydrogel		Macroscopic evaluation, Semi-quantitative macroscopic evaluation, Histology, Immunohistochemistry, Semi-quantitative histological scoring, PCR	√
Zha276	2008	Rabbits	New Zealand White	30	M/F	6 - 8 weeks	2 - 2.5 kg	Lateral condyle	Size: 4 mm / Depth: 3 mm	1) Type I collagen-TCP scaffold, 2) Empty defect	12 weeks	Type I collagen-TCP scaffold		Macroscopic evaluation, Semi-quantitative macroscopic evaluation, Histology, Immunohistochemistry	√		Article in Chinese, excluded for methodological quality assessment
Zhang277	2012	Rabbits	Japanese White	24	M/F	3 months	2 - 2.2 kg	Medial and lateral condyle	Size: 4 x 2 mm? / Depth: ? Mm	1) Chitosan hydrogel + stromal cell derived factor 1ß + TGF-β1, 2) Sham surgery, 3) Empty defect	8, 12 and 16 weeks	Chitosan hydrogel	Stromal cell derived factor 1ß, TGF-β1	Macroscopic evaluation, Semi-quantitative macroscopic evaluation, Histology, Immunohistochemistry, Semi-quantitative histological scoring	√		Article in Chinese, excluded for methodological quality assessment. Assumption for meta-analysis → n = 5/group/time point
Zhang278	2013	Rabbits	New Zealand White	21	M	Adult	2.5 - 3 kg	Trochlea	Size: 4 mm / Depth: 3.5 - 4 mm	1) Type I collagen scaffold (compressed)/Type I collagen scaffold, 2) PLA/Type I collagen scaffold, 3) Empty defect	2, 4 and 6 weeks	PLA/Type I collagen scaffold, Type I collagen scaffold (compressed)/Type I collagen scaffold		Macroscopic evaluation, Semi-quantitative macroscopic evaluation, Histology, Semi-quantitative histological scoring, Biomechanical tests, µCT	√
Zhang279	2013	Rabbits	New Zealand White	9	-	Adult	2.5 - 3 kg	Trochlea	Size: 4 mm / Depth: 3.5 mm	1) Scaffold, 2) Scaffold + PTHrP injection (4 - 6 weeks), 3) Scaffold + PTHrP injection (7 - 9 weeks), 4) Scaffold + PTHrP injection (10 - 12 weeks)	2, 4, 8 and 12 weeks	Silk fibroin-hydroxyapatite/Type I collagen scaffold	PTHrP	Macroscopic evaluation, Semi-quantitative macroscopic evaluation, Histology, Immunohistochemistry, Semi-quantitative histological scoring	X
Zhang*280	2014	Rabbits	New Zealand White	40	M	6 months	3 - 3.5 kg	Trochlea	Size: 4.8 mm / Depth: 7.5 mm	1) β-TCP/Poly(ethylene glycol) hydrogel, 2) Sham surgery, 3) Empty defect	12 hours and 12 weeks	β-TCP/Poly(ethylene glycol) hydrogel		Macroscopic evaluation, Semi-quantitative macroscopic evaluation, Histology, Immunohistochemistry, Semi-quantitative histological scoring, µCT	√
Zhao281	2013	Rabbits	New Zealand White	24	M	Adult	2.5 - 3 kg	Trochlea	Size: 4 mm / Depth: Full-thickness cartilage defect (2 mm) + microfracture (Size: 17G needle, Depth: -, - penetrations/defect)	1) Microfracture, 2) Microfracture + PGA, 3) Microfracture + PGA + BMAC, 4) Microfracture + PGA + MSCs, 5) Empty defect	4 weeks	PGA		Macroscopic evaluation, Histology, Immunohistochemistry, Semi-quantitative histological scoring, Biochemical assays	√		Assumption for meta-analysis → n = 4/group
Zhao282	2014	Rabbits	New Zealand White	30	M	3 months	2 - 2.5 kg	Lateral condyle	Size: 4 mm / Depth: 3 mm	1) PSP-CS/pBudCE4.1, 2) PSP-CS/pBudCE4.1-IL-Ira, 3) PSP-CS/pBudCE4.1-IGF-l, 4) PSPCS/ pBudCE4.1-IL-IRa + IGF-l, 5) Empty defect	1, 2, 4, 8, 16, 24 and 52 weeks	Chitosan		Histology, Immunohistochemistry, PCR, Synovial fluid analysis	X
Zhou283	2008	Rabbits	New Zealand White	30	-	9 - 10 months	3.5 kg (avg)	Trochlea	Size: 3.2 mm / Depth: 6 mm	1) Hydroxyapatite/Fibrin glue/PGA, 2) Hydroxyapatite/Fibrin glue/PGA + MSCs, 3) Empty defect	8 weeks	Hydroxyapatite/Fibrin glue/PGA		Macroscopic evaluation, Histology, Immunohistochemistry, Semi-quantitative histological scoring	√
Remarks
*	Data from Dorotka et al., (OsteoArthritis and Cartilage (2005) 13, 655-664) was similar to Dorotka et al.,(Biomaterials (2005) 26, 3617-3629). The latter study was for this reason excluded.
	Data from Schaefer et al., (Arthritis & Rheumatism (2002) 46, 2524-2534) was similar to Schäfer et al.,(Orthopäde (2004) 33, 721-726). The latter study was for this reason excluded.
	Data from Lubiatowski et al., (Transplantation proceedings 2006, 38, (1), 320-2) was similar to Lubiatowski et al.,(Chirurgia narzadow ruchu i ortopedia polska 2005, 70, (5), 367-71). The latter study was for this reason excluded.
	Data from Zhang et al., (Biomed Res Int, 2014. 2014: p. 746138) was similar to Zhang et al.,(Zhongguo Xiu Fu Chong Jian Wai Ke Za Zhi, 2014. 28(3): p. 318-24). The latter study was for this reason excluded.
