# Supplementary material for: Improved cartilage regeneration by implantation of acellular biomaterials after bone marrow stimulation: a systematic review and meta-analysis of animal studies
Source: PeerJ. 2016 Sep 8;4:e2243. doi: 10.7717/peerj.2243 (PMC5018675; doi:10.7717/peerj.2243)
Supplement: Supplemental Information 6 — Risk of bias results per individual study [file peerj-04-2243-s006.xlsx]

## Sheet: Blad 1
Supplementary Information 6. Risk of bias results per individual study.
For reference list, see Supplementary Information 4.
Author	Year of publication	1. Was the allocation sequence adequately generated and applied?	1. Answer?	2. Were the groups similar at baseline or were they adjusted for confounders in the analysis	2.1. # conditions/animal?	2.1. Answer?	2.2. Dividing of characteristics over groups?	2.2. Answer?	2.3: Difference between groups at moment of surgical intervention?	2.3. Answer?	3. Was the allocation adequately concealed?	3. Answer?	4. Were the animals randomly housed during the experiment	4. Answer?	5. Were the caregivers and/or investigators blinded from knowledge which intervention each animal received during the experiment?	5. Answer?	6. Were the animals selected at random for outcome assessment	6. Answer?	7. Was the outcome assessor blinded?	7. Answer?	8. Were incomplete outcome data adequately addressed?	8. Answer?	Remarks for footnote:
Abarrategi1	2010	?	1.1		?	1.5	?	2.3	-	3.2	?	1.2							-	1.1	-	1.5
Ahn2	2009	?	1.1		?	1.5	?	2.3	-	3.2	?	1.2							-	1.1	-	1.5
Arakaki5	2011	?	1.1		?	1.5	-	2.4	-	3.2	+	1.1			+				?	1.2	-	1.5	Question 5: blinding impossible, right leg always fixed, fixation of legs not randomized. Moreover, for empty defects there were no immobilized legs
Arakaki6	2015	?	1.1		?	1.5	?	2.3	-	3.2	?	1.2							-	1.1	-	1.5
Athanasiou	1997	?	1.1		?	1.5	?	2.3	-	3.2	?	1.2							?	1.2	+	1.4
Aulin8	2013	?	1.3		?	1.5	-	2.4	-	3.2	?	1.2							-	1.1	-	1.5
Bal10	2010	?	1.1		?	1.5	?	2.3	-	3.2	?	1.2							-	1.1	?	1.2
Barron11	2015	?	1.3		?	1.5	?	2.3	-	3.2	?	1.2							-	1.1	-	1.5
Buma19	2003	?	1.1		?	1.5	?	2.3	-	3.2	?	1.2							-	1.1	+	1.1	Documented dropout extensively
Caminal20	2015	?	1.3		?	1.5	?	2.3	-	3.2	?	1.2							-	1.1	+	1.1	Well documented dropout
Cao21	2012	?	1.1		?	1.5	?	2.3	-	3.2	?	1.2							?	1.2	-	1.5
Chang22	2011	?	1.1		?	1.5	-	2.2	-	3.2	?	1.2							-	1.1	-	1.5
Chang23	2013	?	1.3		?	1.5	-	2.4	-	3.2	?	1.2							-	1.1	-	1.5
Chang24	2013	?	1.3		?	1.5	-	2.2	-	3.2	+	1.1							-	1.1	+	1.1
Chang25	2012	?	1.3		?	1.5	-	2.4	-	3.2	+	1.1							-	1.1	+	1.1
Cohen37	2003	?	1.1		?	1.5	?	2.3	-	3.2	?	1.2							-	1.1	-	1.5
Cui40	2009	?	1.1		?	1.5	?	2.3	-	3.2	+	1.1							?	1.2	?	1.2
Dahlin43	2014	?	1.1		?	1.5	-	2.4	-	3.2	?	1.2							-	1.1	-	1.5
Dai44	2014	?	1.1		?	1.5	?	2.3	-	3.2	+	1.1							-	1.1	-	1.5
de Mulder45	2014	-	1.3		-	1.3	-	2.1	-	3.2	?	3.2							-	1.1	-	1.3
Deng46	2012	?	1.1		?	1.5	?	2.3	-	3.2	?	1.2							?	1.2	-	1.5
Dorotka50	2005	?	1.1		?	1.5	?	2.3	+	3.1	?	1.2			+				-	1.1	+	1.4	Question 2.3: animals in group 4 had extra surgery. However, this does not effect the comparison between acellular biomaterials and empty defects
Dresing51	2014	?	1.3		?	1.5	-	2.4	-	3.2	?	1.2							?	1.2	-	1.5
Duan52	2013	?	1.3		?	1.5	?	2.3	-	3.2	?	1.2							-	1.1	-	1.5
Duan53	2013	?	1.1		?	1.5	?	2.3	-	3.2	?	1.2							-	1.1	-	1.5
Enea55	2013	-	1.1		-	1.3	-	2.1	-	3.2	+	1.1							?	1.2	-	1.5
Erggelet56	2009	?	1.1		?	1.5	?	2.3	-	3.2	+	1.1							?	1.2	-	1.5
Filova62	2007	?	1.1		?	1.5	?	2.3	+	3.1	?	1.2			+				-	1.1	-	1.5	Question 5: blinding impossible since animals with the condition 'biomaterial and cells' had extra surgery to obtain cells
Filova63	2013	-	1.1		?	1.2	-	2.1	-	3.2	+	1.1							-	1.1	-	1.5
Fonseca64	2014	?	1.1		?	1.5	?	2.3	-	3.2	?	1.2							-	1.1	+	1.4
Frenkel66	2005	?	1.1		?	1.5	?	2.3	-	3.2	?	1.2							-	1.1	-	1.5
Frenkel67	1997	?	1.1		?	1.5	?	2.3	-	3.2	?	1.2							-	1.1	-	1.5
Fujimoto68	1999	?	1.1		?	1.5	?	2.3	-	3.2	?	1.2							?	1.2	-	1.5
Fukui70	2014	?	1.1		?	1.5	-	2.4	-	3.2	+	1.1							?	1.2	-	1.5
Getgood75	2012	?	1.1		?	1.5	?	2.3	-	3.2	?	1.2							-	1.1	+	1.1	Well documented dropout
Getgood76	2012	?	1.3		?	1.5	?	2.3	-	3.2	?	1.2							-	1.1	-	1.5
Ghosh77	2014	?	1.1		?	1.5	?	2.3	-	3.2	+	1.1							-	1.1	-	1.5
Giordano78	2011	-	1.1		-	1.3	-	2.1	-	3.2	+	1.1							?	1.2	-	1.4
Gotterbarm80	2006	?	1.3		?	1.5	?	2.3	-	3.2	?	1.2							-	1.1	-	1.4
Guenther81	2014	?	1.1		?	1.5	?	2.3	-	3.2	?	1.2							?	1.2	-	1.5
Gupta86	2014	?	1.3		?	1.5	?	2.3	-	3.2	+	1.1							?	1.2	-	1.5
Guzman-Morales87	2014	?	1.1		?	1.5	?	2.3	-	3.2	?	1.2							-	1.1	+	1.4
Hamanishi88	2013	?	1.1		?	1.5	?	2.3	-	3.2	+	1.1							-	1.1	-	1.5
Hoemann97	2005	-	1.4		-	1.6	-	2.2	-	3.2	+	1.1					+		-	1.1	-	1.5	Evaluation time point 27-30 weeks
Hoemann98	2007	-	1.1		-	1.3	-	2.1	-	3.2	+	1.1	+						-	1.1	-	1.5	The authors chose for difference in housing, but group results together
Holland101	2007	?	1.1		?	1.5	?	2.3	-	3.2	?	1.2							-	1.1	+	1.1	Well documented dropout
Howard104	2015	?	1.1		?	1.5	?	2.3	-	3.2	?	1.2							-	1.1	-	1.5
Huang105	2014	?	1.1		?	1.5	?	2.3	-	3.2	?	1.2							?	1.2	-	1.5
Huang106	2007	?	1.1		?	1.5	?	2.3	-	3.2	?	1.2							-	1.1	-	1.5
Huh107	2014	-	1.1		-	1.3	-	2.1	-	3.2	+	1.1							?	1.2	-	1.5
Hui108	2013	-	1.1		?	1.5	?	2.3	-	3.2	+	1.1							?	1.2	-	1.5
Igarashi109	2010	?	1.1		?	1.5	?	2.3	-	3.2	?	1.2							-	1.1	-	1.5
Igarashi110	2012	?	1.1		?	1.5	?	2.3	-	3.2	?	1.2							-	1.1	-	1.5
Im112	2010	?	1.1		?	1.5	-	2.4	-	3.2	?	1.2							-	1.1	-	1.5
Intzoglou114	2014	?	1.1		?	1.5	-	2.4	-	3.2	?	1.2							-	1.1	-	1.5
Ishii115	2007	?	1.1		?	1.5	-	2.4	-	3.2	?	1.2							-	1.1	-	1.5
Jagodzinski118	2014	-	1.4		-	1.6	-	2.4	-	3.2	?	1.2							?	1.2	-	1.5
Jang119	2014	?	1.3		?	1.5	?	2.3	-	3.2	?	1.2							?	1.2	-	1.5
Jansen120	2009	?	1.3		?	1.5	-	2.4	-	3.2	?	1.2							-	1.1	-	1.5
Jiang122	2007	?	1.1		?	1.5	?	2.3	-	3.2	?	1.2							-	1.1	-	1.5
Jiang123	2013	?	1.1		?	1.5	?	2.3	-	3.2	?	1.2							-	1.1	-	1.5
Jung127	2006	?	1.3		?	1.5	-	2.4	-	3.2	?	1.2							-	1.1	+	1.1	Well documented dropout
Kang130	2014	?	1.3		?	1.5	?	2.3	-	3.2	?	1.2							?	1.2	-	1.5
Kawaguchi132	2011	?	1.3		?	1.5	?	2.3	-	3.2	?	1.2							?	1.2	-	1.5
Kayakabe133	2006	?	1.3		?	1.5	?	2.3	-	3.2	?	1.2							-	1.1	-	1.5
Kazemi134	2014	-	1.1		-	1.3	-	2.1	-	3.2	+	1.1							-	1.1	-	1.5
Kitamura137	2011	-	1.1		-	1.3	-	2.1	-	3.2	+	1.1							?	1.2	-	1.3
Kon138	2010	?	1.1		?	1.5	-	2.4	+	3.1	?	1.2			+				?	1.2	-	1.5	Question 5: blinding impossible since animals with the condition 'biomaterial and cells' had extra surgery to obtain cells
Kon139	2010	?	1.3		?	1.5	?	2.3	-	3.2	?	1.2							?	1.2	-	1.5
Kon140	2013	?	1.1		?	1.5	?	2.3	-	3.2	?	1.2							-	1.1	-	1.5
Kubo145	2007	-	1.1		-	1.3	-	2.1	-	3.2	+	1.1							?	1.2	-	1.5
Lee149	2012	?	1.1		?	1.5	-	2.4	-	3.2	?	1.2							-	1.1	+	1.4
Lee150	2013	?	1.1		?	1.5	-	2.4	-	3.2	?	1.2							-	1.1	+	1.4
Li152	2008	?	1.3		?	1.5	-	2.4	-	3.2	?	1.2							-	1.1	-	1.5
Li154	2015	?	1.1		?	1.5	?	2.3	-	3.2	?	1.2							-	1.1	-	1.5
Liu158	2006	?	1.3		?	1.5	?	2.3	+	3.1	?	1.2			+				?	1.2	-	1.5	Question 5: blinding impossible since animals with the condition 'biomaterial and cells' had extra surgery to obtain cells
Liu160	2014	?	1.3		?	1.5	?	2.3	-	3.2	?	1.2							?	1.2	-	1.5
Lohan161	2014	?	1.3		?	1.5	?	2.3	-	3.2	?	1.2							?	1.2	-	1.5
Lubiatowski166	2006	?	1.1		?	1.5	?	2.3	-	3.2	+	1.1							?	1.2	-	1.5
Luo167	2015	?	1.1		?	1.5	?	2.3	-	3.2	?	1.2							-	1.1	-	1.5
Maehara168	2010	?	1.1		?	1.5	?	2.3	-	3.2	?	1.2							-	1.1	-	1.5
Marmotti170	2012	?	1.3		?	1.5	?	2.3	-	3.2	?	1.2							-	1.1	+	1.1
Marmotti171	2013	?	1.3		?	1.5	?	2.3	-	3.2	?	1.2							-	1.1	+	1.1
Masuoka175	2006	?	1.1		?	1.5	-	2.4	-	3.2	?	1.2							?	1.2	-	1.5
Matsuda176	2013	?	1.3		?	1.5	-	2.4	-	3.2	?	1.2							?	1.2	-	1.5
Mazaki177	2014	?	1.3		?	1.5	?	2.3	-	3.2	?	1.2							?	1.2	-	1.4	For macroscopic evaluation one animal is missing, number of samples for histology is correct
Messner179	1994	?	1.1		?	1.5	?	2.3	-	3.2	?	1.2							?	1.2	+	1.1	Well documented dropout
Mierisch181	2002	?	1.1		?	1.5	?	2.3	-	3.2	?	1.2							-	1.1	-	1.5
Miller183	2010	?	1.1		?	1.5	-	2.4	-	3.2	?	1.2							-	1.1	+	1.1
Mohan187	2011	?	1.1		?	1.5	?	2.3	-	3.2	?	1.2							?	1.2	-	1.5
Mori188	2013	?	1.1		?	1.5	?	2.3	-	3.2	?	1.2							-	1.1	-	1.5
Mrosek189	2010	?	1.1		?	1.5	?	2.3	-	3.2	+								-	1.1	-	1.5	Concealment impossible since fixed locations are used
Muller190	2006	?	1.1		?	1.5	?	2.3	-	3.2	?	1.2							+	1.3	-	1.5	Authors aimed to score sections blinded, however, impossible due to remains of implants
Munirah191	2007	?	1.1		?	1.5	-	2.4	-	3.2	?	1.2							?	1.2	-	1.5
Nagura192	2007	?	1.3		?	1.5	?	2.3	-	3.2	+	1.1							-	1.1	-	1.5
Necas193	2010	?	1.1		?	1.5	?	2.3	-	3.2	?	1.2							?	1.2	-	1.5
Nettles195	2008	-	1.3		-	1.3	-	2.1	-	3.2	+	1.1							-	1.1	-	1.5
Ogawa199	2012	?	1.3		?	1.5	-	2.4	-	3.2	?	1.2							?	1.2	-	1.5
Oliveira200	2010	?	1.1		?	1.5	-	2.4	-	3.2	?	1.2							-	1.1	-	1.5
Pei204	2009	?	1.1		?	1.5	-	2.4	-	3.2	?	1.2							-	1.1	-	1.5
Perka205	2000	?	1.1		?	1.5	?	2.3	-	3.2	?	1.2							-	1.1	-	1.5
Perka206	2000	?	1.1		?	1.5	?	2.3	-	3.2	?	1.2							-	1.1	-	1.5
Ravanetti212	2015	-	1.3		?	1.5	?	2.3	-	3.2	+	1.1							?	1.2	-	1.5
Reyes214	2012	?	1.1		?	1.5	-	2.4	-	3.2	?	1.2							?	1.2	-	1.5
Reyes215	2014	?	1.1		?	1.5	?	2.3	-	3.2	?	1.2							?	1.2	-	1.5
Reyes216	2013	?	1.1		?	1.5	-	2.4	-	3.2	?	1.2							?	1.2	-	1.5
Rudert217	2005	?	1.3		?	1.5	-	2.4	-	3.2	?	1.2							-	1.1	-	1.5
Sakata219	2014	?	1.1		?	1.5	-	2.4	-	3.2	+	1.1							?	1.2	-	1.5
Schaefer221	2002	?	1.3		?	1.5	-	2.4	-	3.2	?	1.2							-	1.1	+	1.4
Schagemann222	2009	?	1.1		?	1.8	-	2.1	-	3.2	?	1.2							-	1.1	-	1.5
Solchaga234	2002	?	1.1		?	1.5	?	2.3	-	3.2	?	1.2							-	1.1	-	1.5
Solchaga236	2000	?	1.1		?	1.5	?	2.3	-	3.2	?	1.2							-	1.1	-	1.5
Sosio238	2015	?	1.1		?	1.8	-	2.1	-	3.2	?	1.2							-	1.1	-	1.5
Sotoudeh239	2013	-	1.1		-	1.3	-	2.4	-	3.2	+	1.1							-	1.1	-	1.5
Streitparth241	2009	?	1.3		?	1.5	?	2.3	-	3.2	?	1.2							-	1.1	-	1.5
Sukegawa242	2012	?	1.1		?	1.5	-	2.4	-	3.2	?	1.2							-	1.1	-	1.5
Sun243	2010	?	1.1		?	1.5	?	2.3	-	3.2	?	1.2							-	1.1	-	1.5
Tamai245	2005	?	1.1		?	1.5	?	2.3	-	3.2	?	1.2							?	1.2	-	1.5
Tan246	2011	?	1.3		?	1.5	?	2.3	-	3.2	?	1.2							?	1.2	-	1.5
Tatebe248	2005	?	1.1		?	1.5	?	2.3	-	3.2	?	1.2							?	1.2	-	1.5
Toyokawa249	2010	?	1.1		?	1.5	?	2.3	-	3.2	?	1.2							-	1.1	-	1.5
Wakitani251	1994	?	1.1		?	1.5	?	2.3	-	3.2	?	1.2							?	1.2	-	1.5
Wang257	2014	?	1.3		?	1.5	?	2.3	-	3.2	?	1.2							?	1.2	-	1.5
Wegener259	2010	?	1.1		?	1.5	?	2.3	-	3.2	?	1.2							-	1.1	-	1.5
Wegener260	2009	?	1.1		?	1.5	?	2.3	-	3.2	?	1.2							-	1.1	-	1.5
Xie263	2010	?	1.1		?	1.5	?	2.3	-	3.2	?	1.2							-	1.1	+	1.4	Unclear dividing of samples for different analaysis and number of samples per assay
Xie264	2012	?	1.1		?	1.5	?	2.3	-	3.2	?	1.2							-	1.1	-	1.5
Yagihashi265	2009	?	1.3		?	1.5	-	2.4	-	3.2	?	1.2							?	1.2	-	1.5
Yasuda270	2009	?	1.1		?	1.5	?	2.3	-	3.2	?	1.2							?	1.2	-	1.5
Ylanen274	1999	-	1.1		-	1.3	-	2.1	-	3.2	?	1.2							?	1.2	-	1.5
Yokota275	2011	?	1.1		?	1.5	?	2.3	-	3.2	?	1.2							?	1.2	-	1.5
Zhang278	2013	?	1.1		?	1.5	?	2.3	-	3.2	?	1.2							-	1.1	-	1.5
Zhang280	2014	?	1.1		?	1.5	-	2.4	-	3.2	?	1.2							-	1.1	-	1.5
Zhao282	2013	?	1.1		?	1.5	?	2.3	-	3.2	?	1.2							-	1.1	-	1.5
Zhou283	2008	?	1.1		?	1.5	?	2.3	-	3.2	?	1.2							-	1.1	-	1.5
