# Supplementary material for: Improved cartilage regeneration by implantation of acellular biomaterials after bone marrow stimulation: a systematic review and meta-analysis of animal studies
Source: PeerJ journal article supplement (doi:10.7717/peerj.2243), 2016-09-08

# Supplementary Information 7. Forest plot.

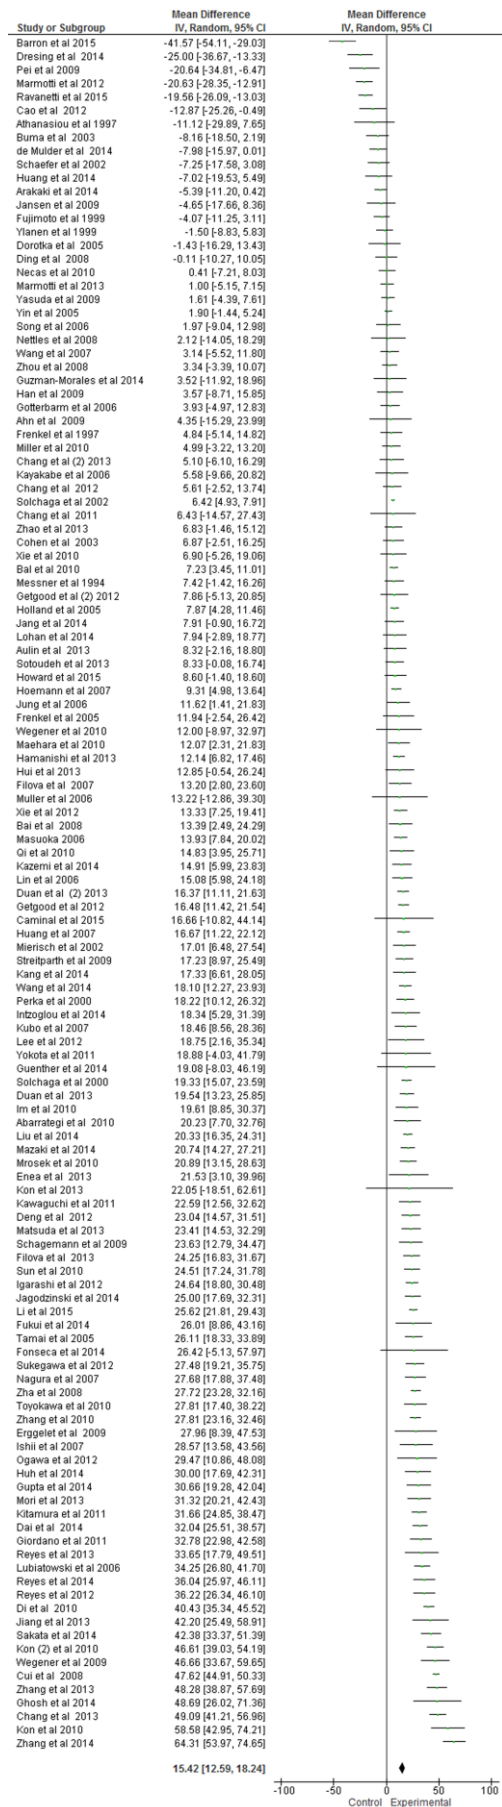

Supplement: Supplementary_Information_7_-_Forest_plot.pdf [file Supplementary_Information_7_-_Forest_plot.pdf]
